# Supplementary material for: Evolutionary epigenomic analyses in mammalian early embryos reveal species-specific innovations and conserved principles of imprinting
Source: PubMed Central journal article supplement — Sci Adv. 2021 Nov 24;7(48):eabi6178. doi: 10.1126/sciadv.abi6178 (PMC8612685; doi:10.1126/sciadv.abi6178), 2021-11-24
Supplement: sciadv.abi6178_sm.pdf [file sciadv.abi6178_sm.pdf]

Supplementary Materials for

**Evolutionary epigenomic analyses in mammalian early embryos reveal species-specific innovations and conserved principles of imprinting**

Xukun Lu, Yu Zhang, Lijuan Wang, Leyun Wang, Huili Wang, Qianhua Xu, Yunlong Xiang, Chaolei Chen, Feng Kong, Weikun Xia, Zili Lin, Sinan Ma, Ling Liu, Xiangguo Wang, Hemin Ni, Wei Li\*, Yong Guo\*, Wei Xie\*

\*Corresponding author. Email: liwei@ioz.ac.cn (W.L.); y63guo@126.com (Y.G.); xiewei121@tsinghua.edu.cn (W.X.)

Published 24 November 2021, *Sci. Adv.* 7, eabi6178 (2021)  
DOI: 10.1126/sciadv.abi6178

**The PDF file includes:**

Figs. S1 to S17  
Legends for tables S1 to S4  
References

**Other Supplementary Material for this manuscript includes the following:**

Tables S1 to S4

Figure S1

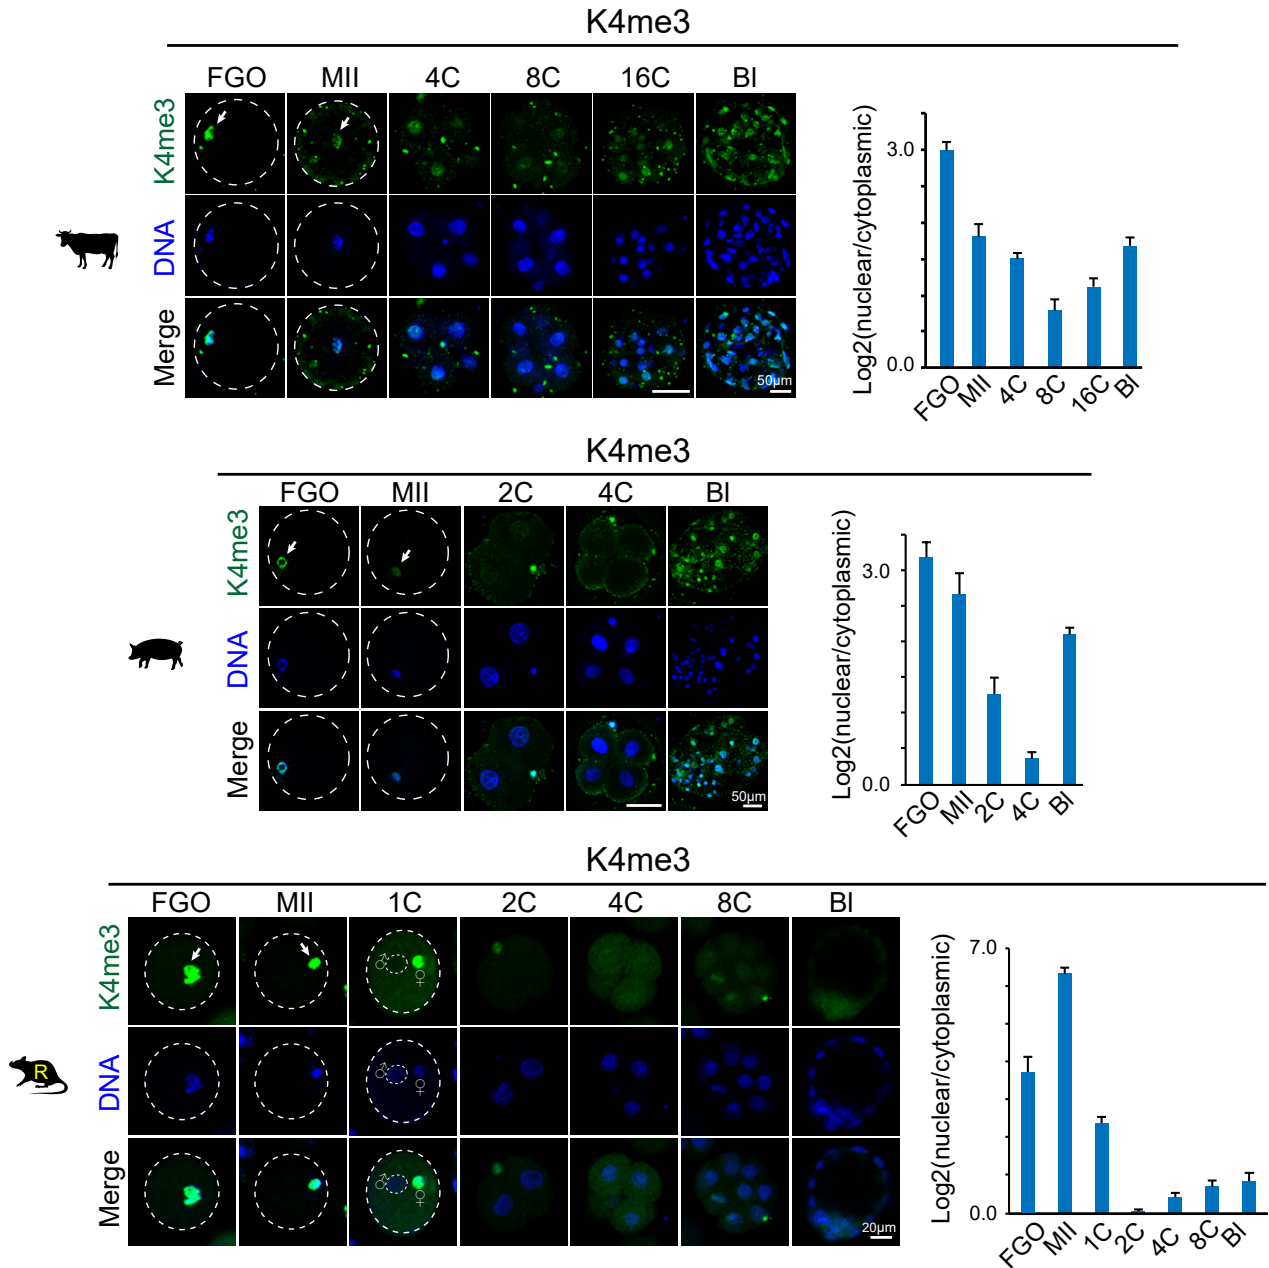

**Figure S1. The dynamics of H3K4me3 in mammalian oocytes and preimplantation embryos.** Immunofluorescent staining results showing the dynamics of H3K4me3 (K4me3) from FGO to blastocyst in bovine, porcine, and rat. The oocytes are circled by white dashed lines. White arrows indicate the nuclei and chromatin for FGOs and MII oocytes, respectively. In rat 1-cell, both female and male pronucleus (small white dashed lines) are shown. For bovine and porcine samples, bar=50 µm; for rat samples, bar=20 µm. The relative levels of H3K4me3 (log2 transformed nuclear/cytoplasmic fluorescence intensity, mean ± SEM) at each stage of the three species are shown on the right. FGO, full-grown oocyte; MII, metaphase II-stage oocyte; 1C, 1-cell embryo; 2C, late 2-cell embryo; 4C, 4-cell embryo; 8C, 8-cell embryo; 16C, 16-cell embryo; BI, blastocyst.

Figure S2

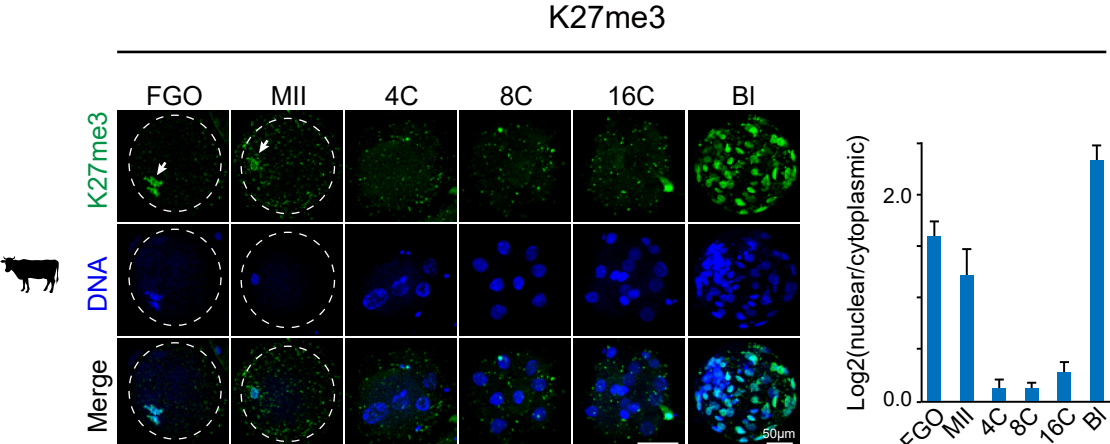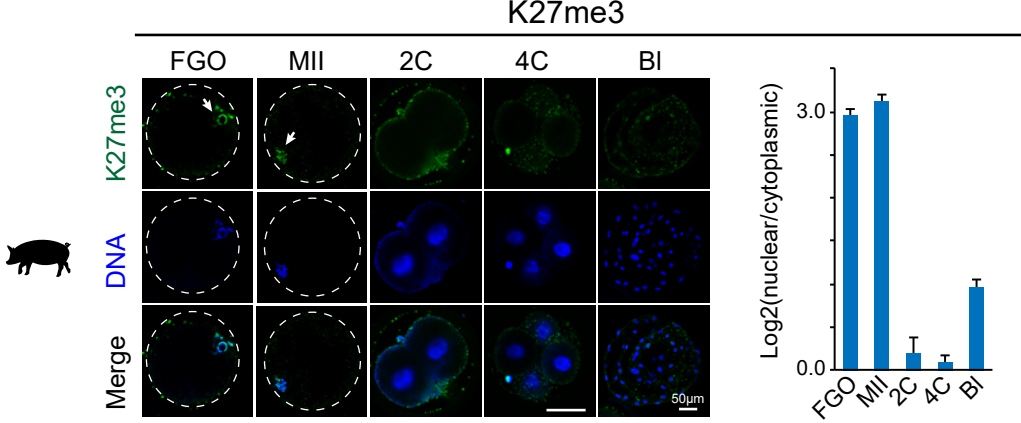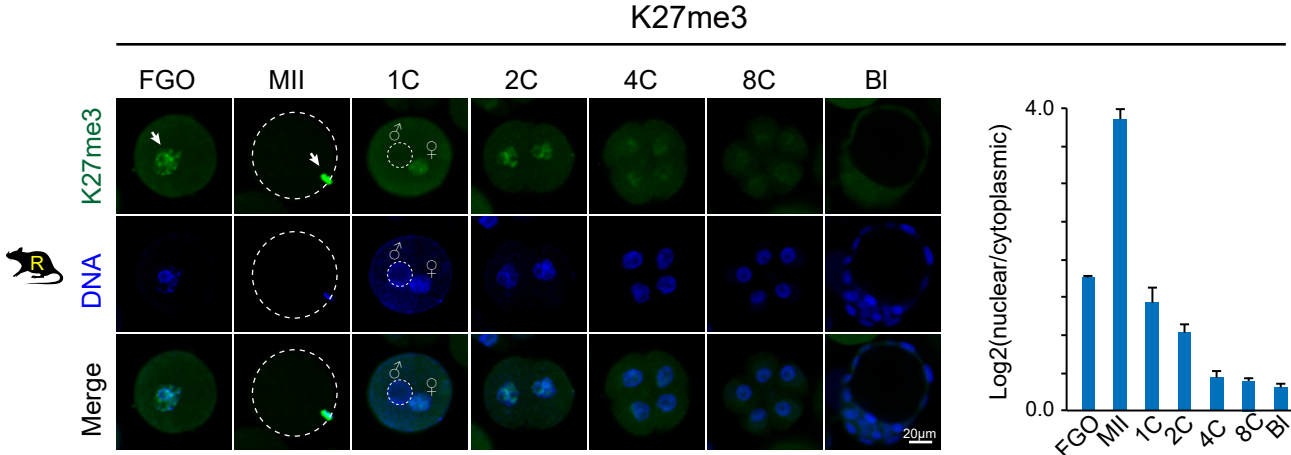

**Figure S2. The dynamics of H3K27me3 in mammalian oocytes and preimplantation embryos.** Immunofluorescent staining results showing the dynamics of H3K27me3 (K27me3) from FGO to blastocyst in bovine, porcine, and rat. The oocytes are circled by white dashed lines. White arrows indicate the nuclei or chromatins of FGOs or MII oocytes, respectively. In rat 1-cell, both female and male pronucleus (small white dashed lines) are shown. For bovine and porcine samples, bar=50  $\mu\text{m}$ ; for rat samples, bar=20  $\mu\text{m}$ . The relative levels of H3K27me3 ( $\log_2$  transformed nuclear/cytoplasmic fluorescence intensity) at each stage of the three species are shown on the right. Data are shown as mean  $\pm$  SEM. FGO, full-grown oocyte; MII, metaphase II-stage oocyte; 1C, 1-cell embryo; 2C, late 2-cell embryo; 4C, 4-cell embryo; 8C, 8-cell embryo; 16C, 16-cell embryo; B1, blastocyst.



Figure S3

A

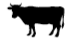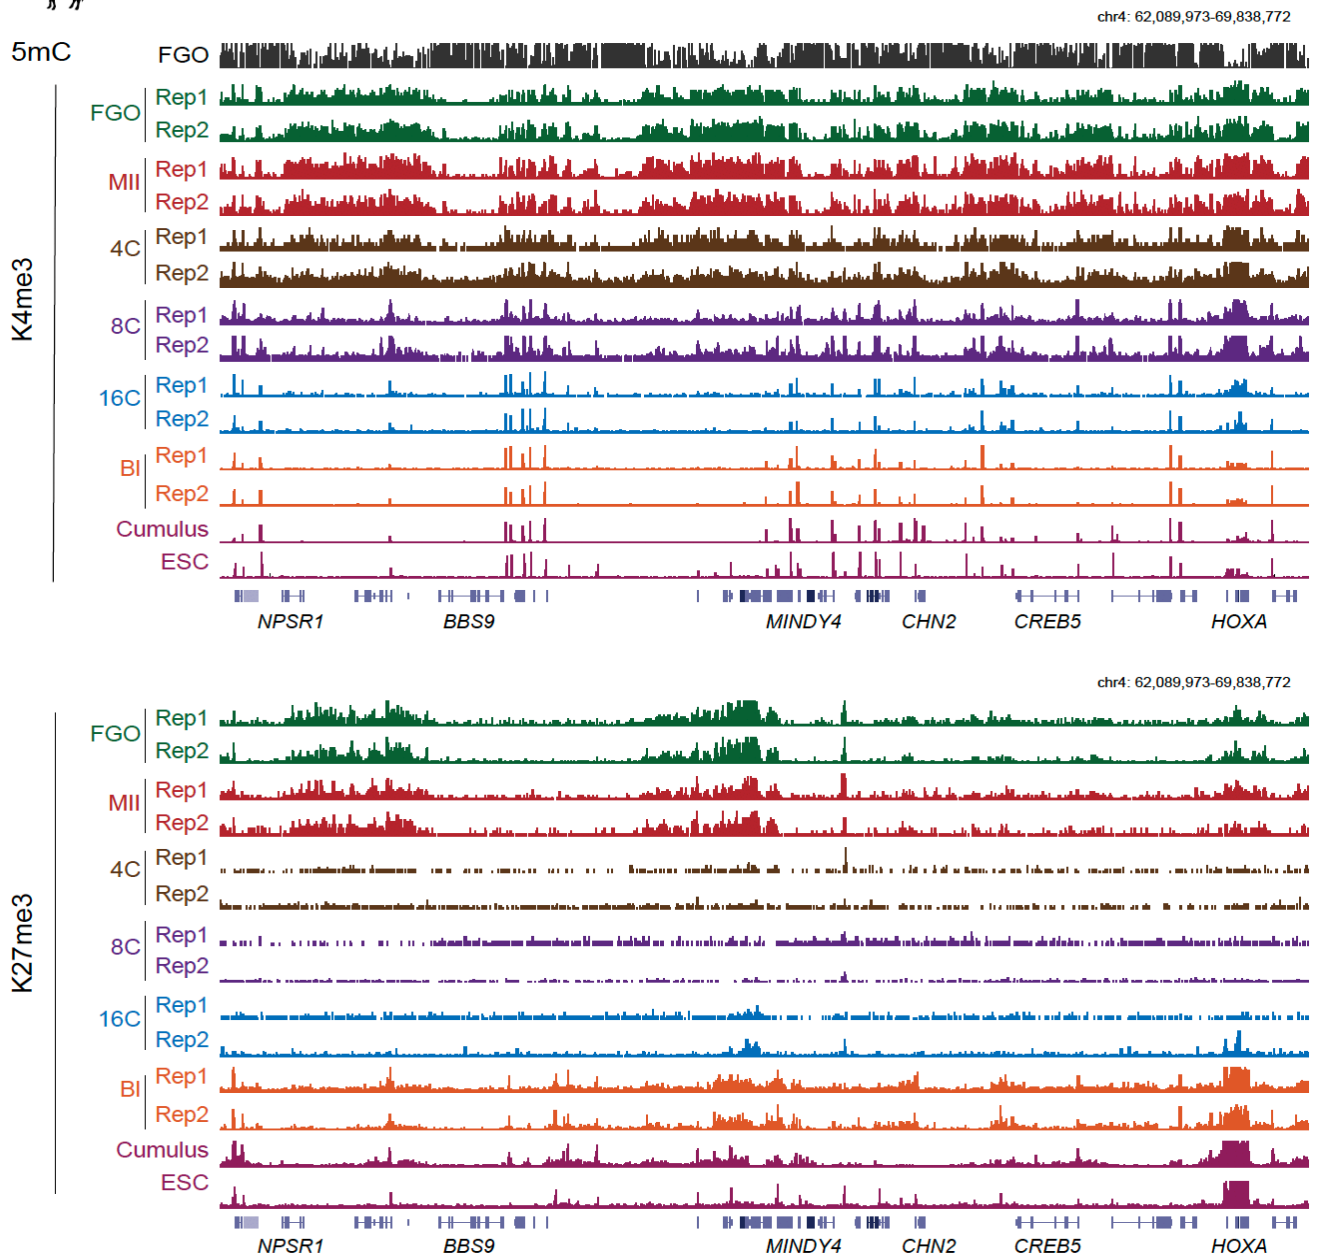

B

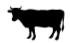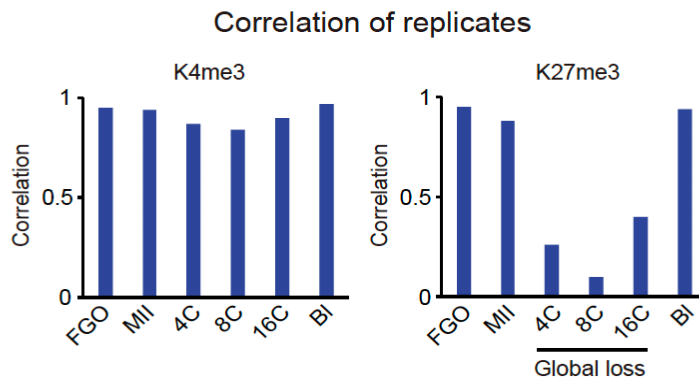

**Figure S3. Global view of DNA methylation in FGOs and histone modifications in oocytes and early embryos in bovine.** (A) UCSC genome browser views showing DNA methylation (5mC) in FGOs, two replicates of H3K4me3 (K4me3) and H3K27me3 (K27me3) in FGO, MII, 4C, 8C, 16C and Bl. Cumulus cell and ESC data (69) are also shown for comparison. (B) Barplots showing the Pearson correlation between replicates for H3K4me3 and H3K27me3 data in bovine. FGO, full-grown oocyte; MII, metaphase II-stage oocyte; 4C, 4-cell embryo; 8C, 8-cell embryo; 16C, 16-cell embryo; Bl, blastocyst. Note the stages showing lower correlation are those when H3K27me3 undergoes global loss (indicated).

Figure S4

A

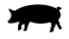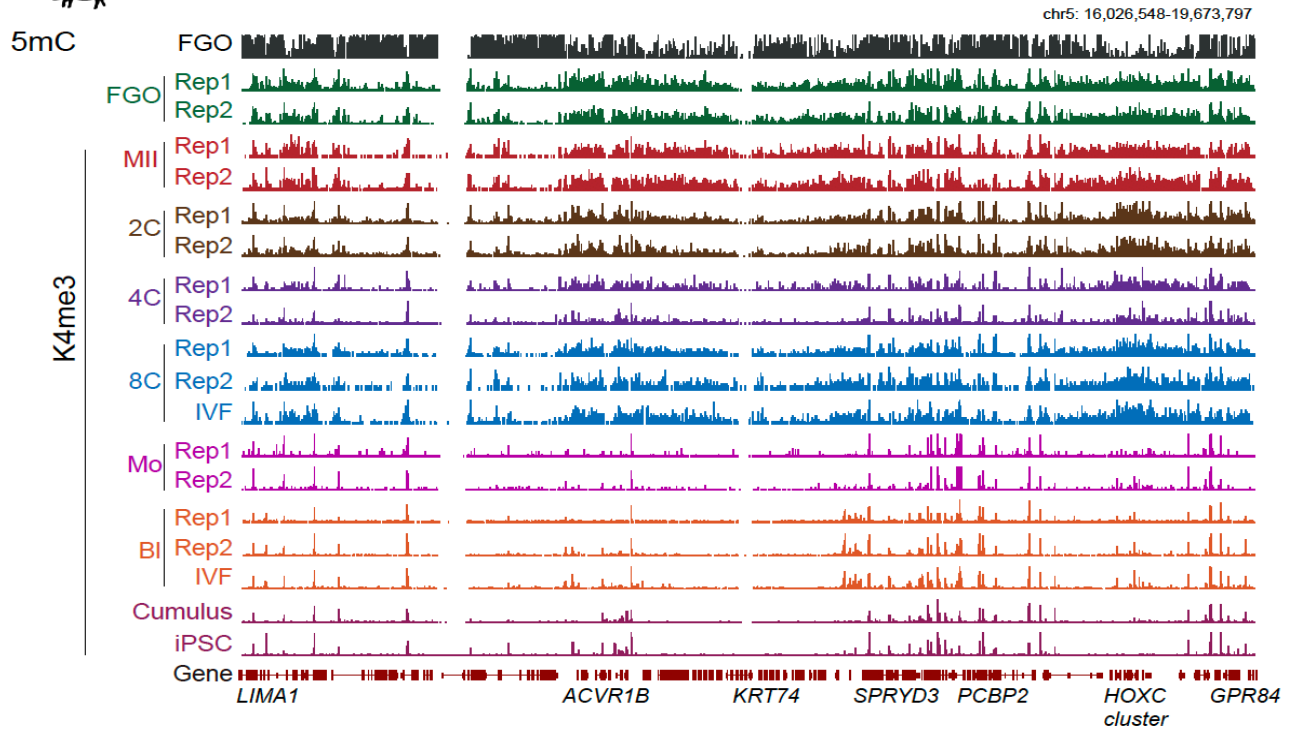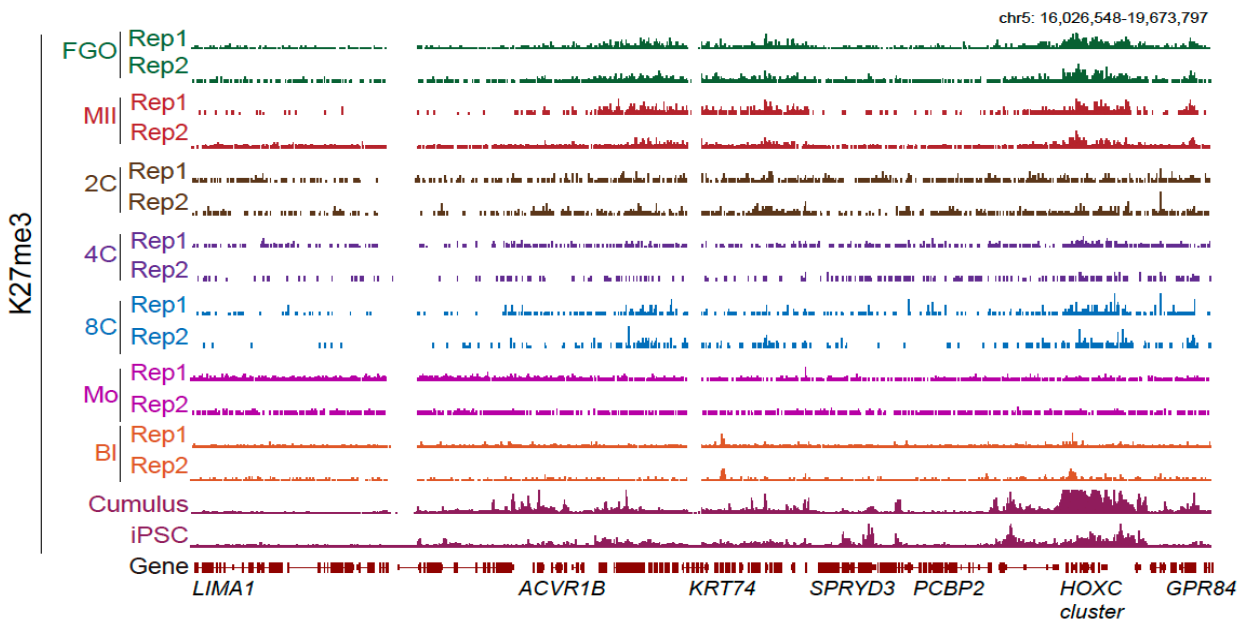

B

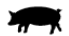

Correlation of replicates

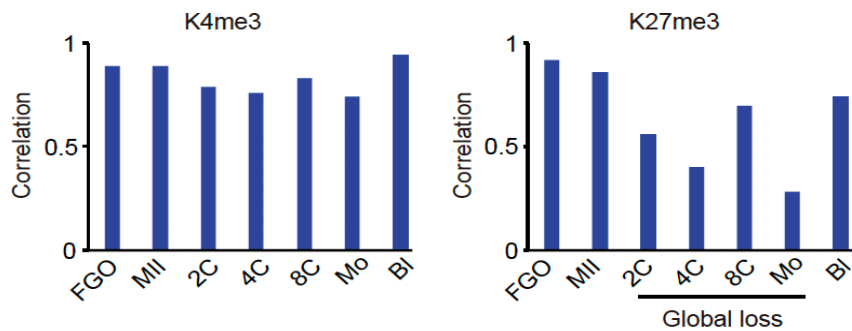

**Figure S4. Global view of DNA methylation in FGOs and histone modifications in oocytes and early embryos in porcine.** (A) UCSC genome browser views showing DNA methylation (5mC) in FGOs, two replicates of H3K4me3 (K4me3) and H3K27me3 (K27me3) in FGO, MII, 2C, 4C, 8C, Mo and Bl. Cumulus cell and iPSC data (70) are also shown for comparison. H3K4me3 in *in vitro* fertilized (IVF) 8C and blastocyst are also shown. (B) Barplots showing the Pearson correlation between replicates for H3K4me3 and H3K27me3 data in porcine. FGO, full-grown oocyte; MII, metaphase II-stage oocyte; 2C, late 2-cell embryo; 4C, 4-cell embryo; 8C, 8-cell embryo; Mo, morula, Bl, blastocyst. Note the stages showing lower correlation are those when H3K27me3 undergoes global loss (indicated).

Figure S5

A

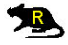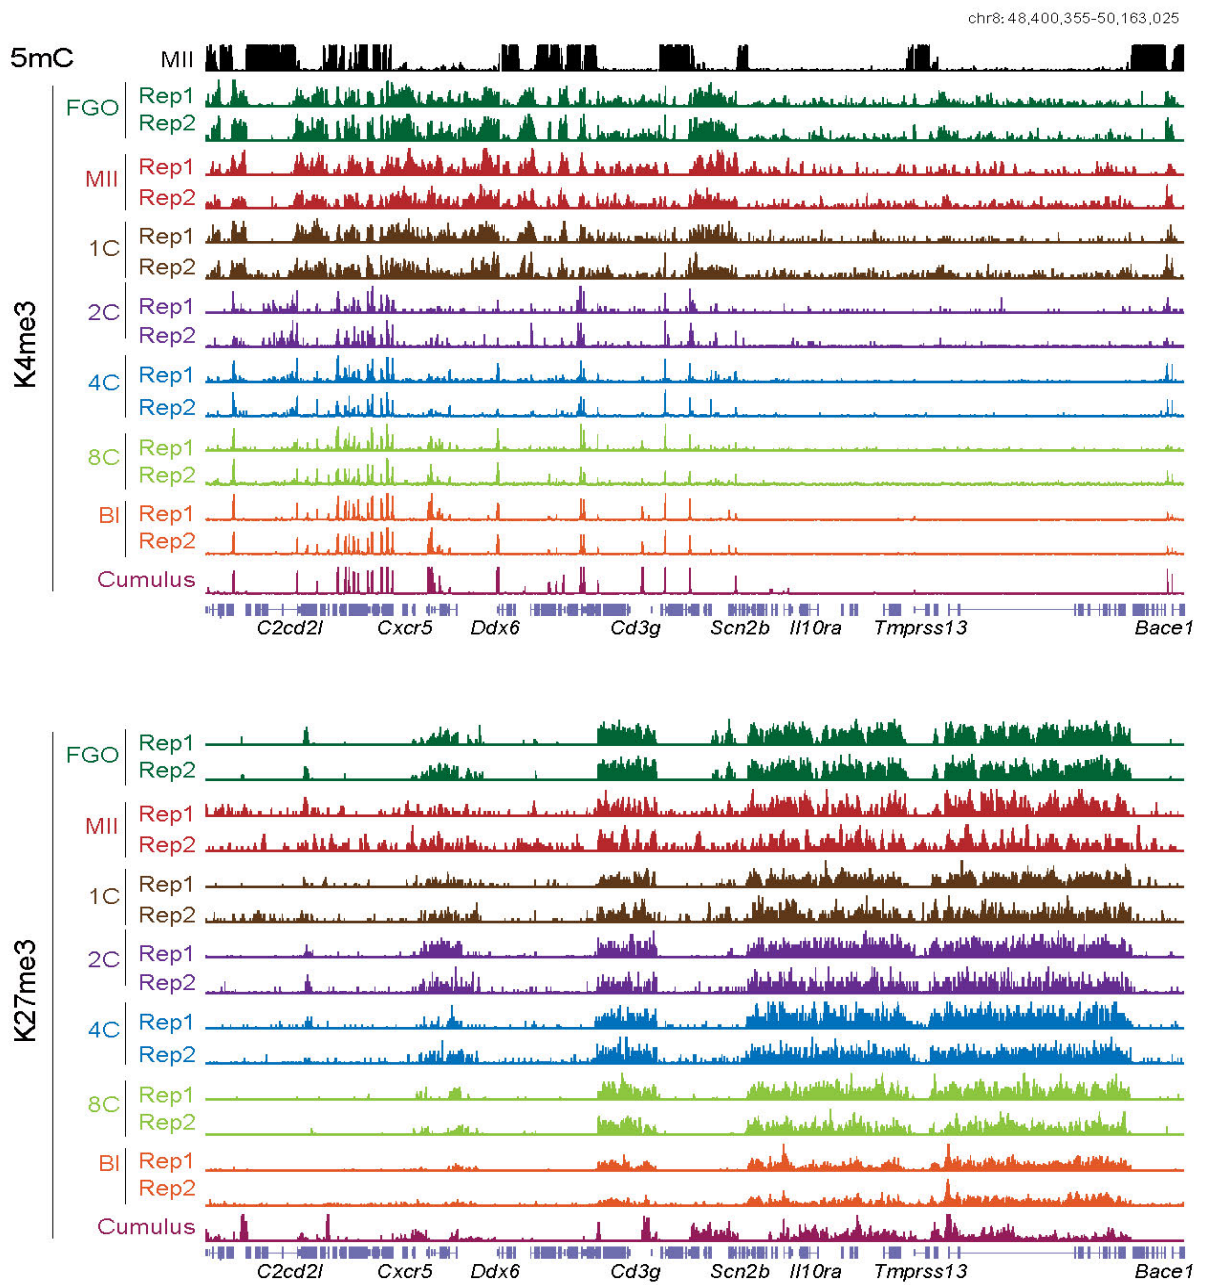

B

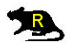

Correlation of replicates

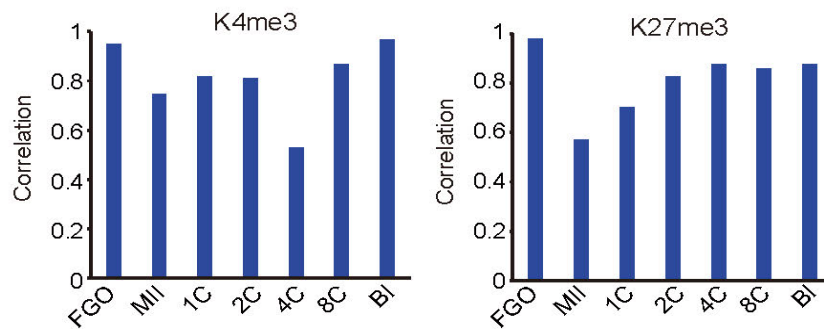

**Figure S5. Global view of DNA methylation in MII oocytes and histone modifications in oocytes and early embryos in rat.** (A) UCSC genome browser views showing DNA methylation (5mC) in MII oocytes (26), two replicates of H3K4me3 (K4me3) and H3K27me3 (K27me3) in FGO, MII, 1C, 2C, 4C, 8C and Bl. Cumulus cell data are also shown for comparison. (B) Barplots showing the Pearson correlation between replicates for H3K4me3 and H3K27me3 data in rat. FGO, full-grown oocyte; MII, metaphase II-stage oocyte; 1C, 1-cell embryo; 2C, late 2-cell embryo; 4C, 4-cell embryo; 8C, 8-cell embryo; Bl, blastocyst.

Figure S6

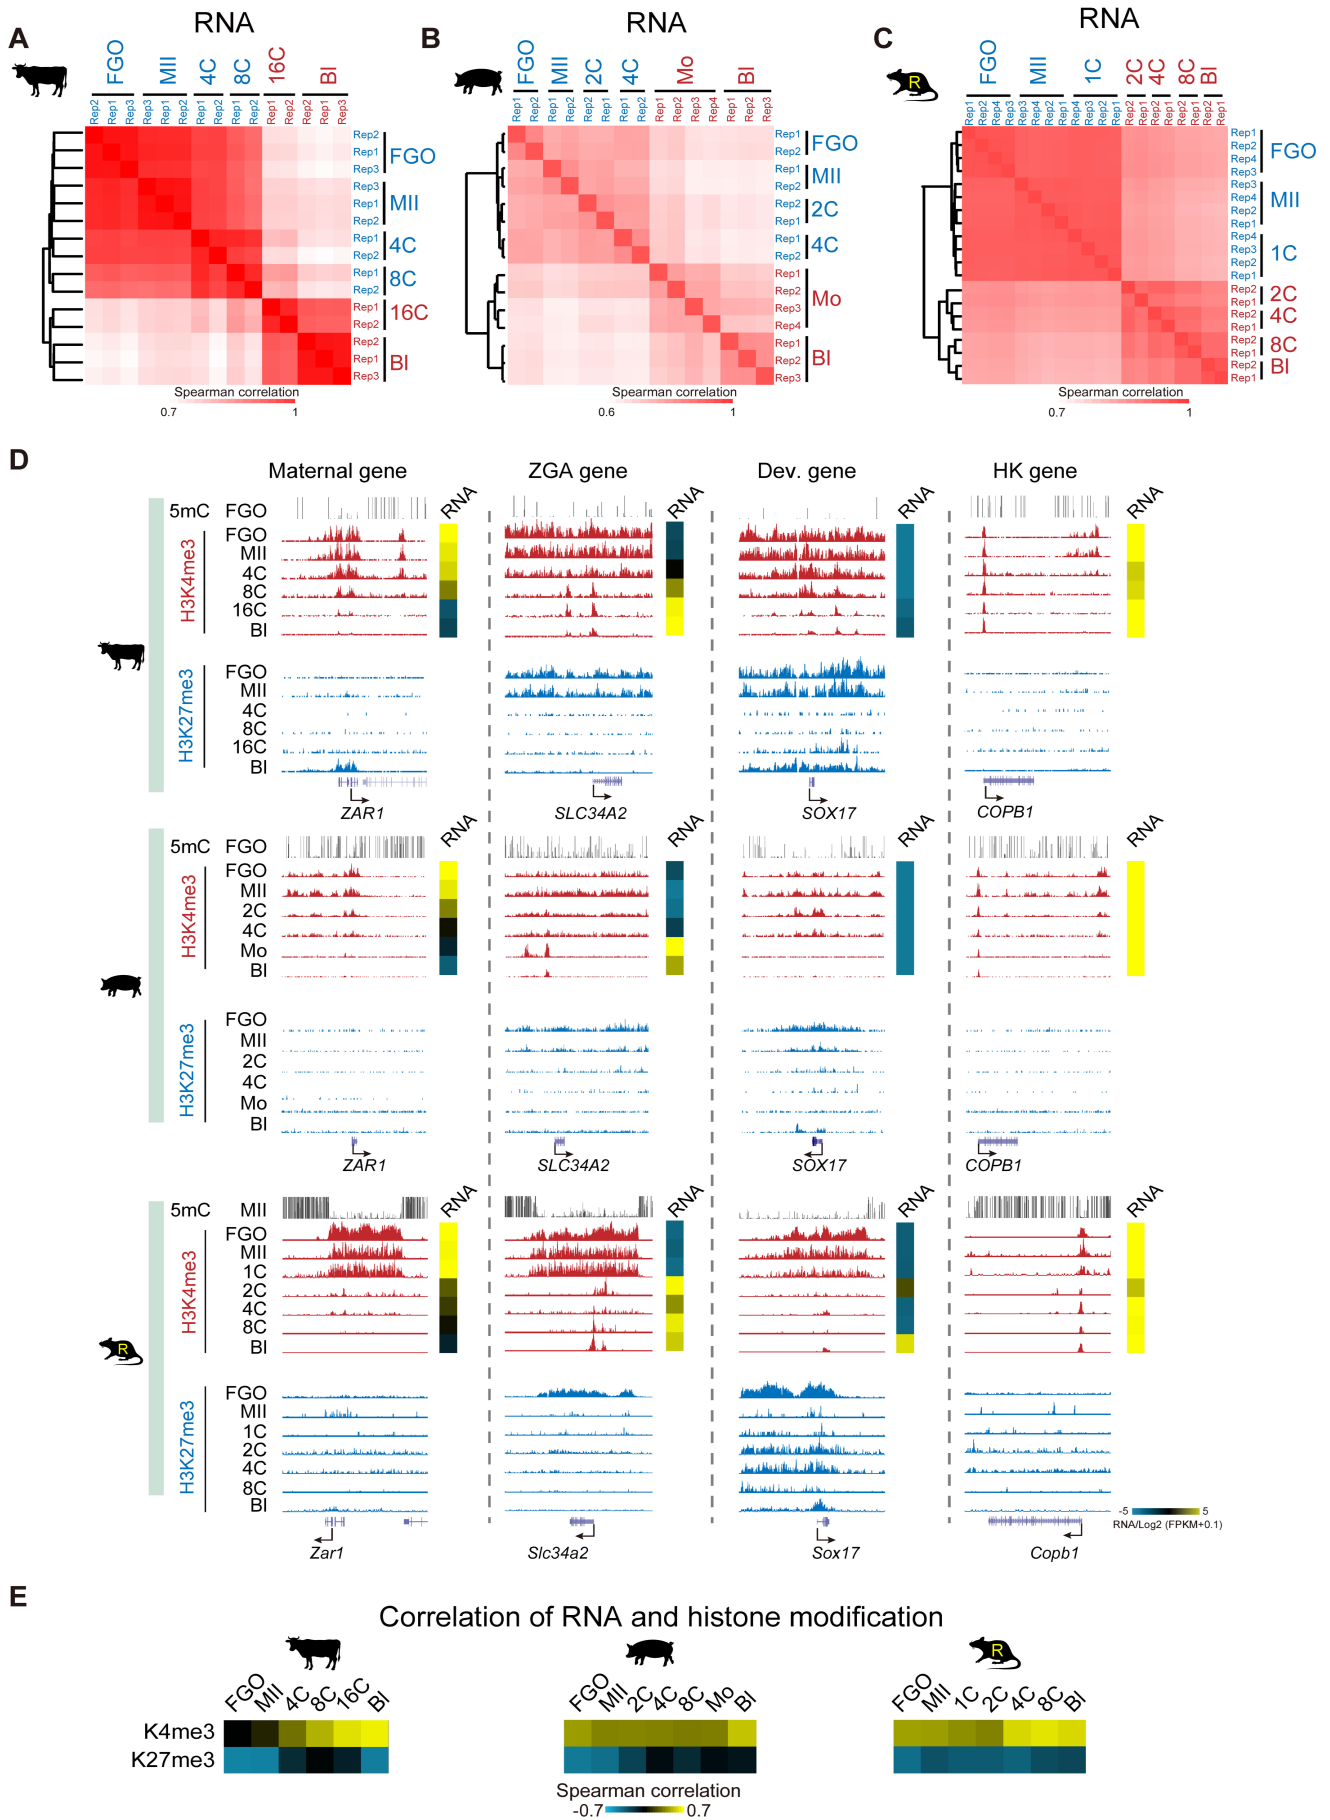

**Figure S6. Global view of RNA-seq data in mammalian oocytes and early embryos.** (A) Heatmap showing the pairwise Spearman correlation between replicates of the RNA-seq data among all development stages in bovine. The cluster on the left shows the relationship of all development stages. Blue, the oocyte and pre-ZGA stages; red, the post-ZGA stages. (B and C) Similar analysis as a for porcine (B) and rat (C). (D) Snapshots from UCSC genome browser showing the distribution of DNA methylation (5mC), H3K4me3 (K4me3) and H3K27me3 (K27me3) signals at representative gene loci in the oocytes and pre-implantation embryos of bovine, porcine and rat. Gene expression is also shown by heatmaps ( $\log_2$  transformed FPKM+0.1). ZGA, zygotic genome activation; Dev., developmental; HK, housekeeping gene. (E) Heatmaps showing the Spearman correlation between promoter H3K4me3 (K4me3) or H3K27me3 (K27me3) and gene expression across all genes. FGO, full-grown oocyte; MII, metaphase II-stage oocyte; 1C, 1-cell embryo; 2C, late 2-cell embryo; 4C, 4-cell embryo; 8C, 8-cell embryo; 16C, 16-cell embryo; Mo, morula; Bl, blastocyst; ICM, inner cell mass.



Figure S7

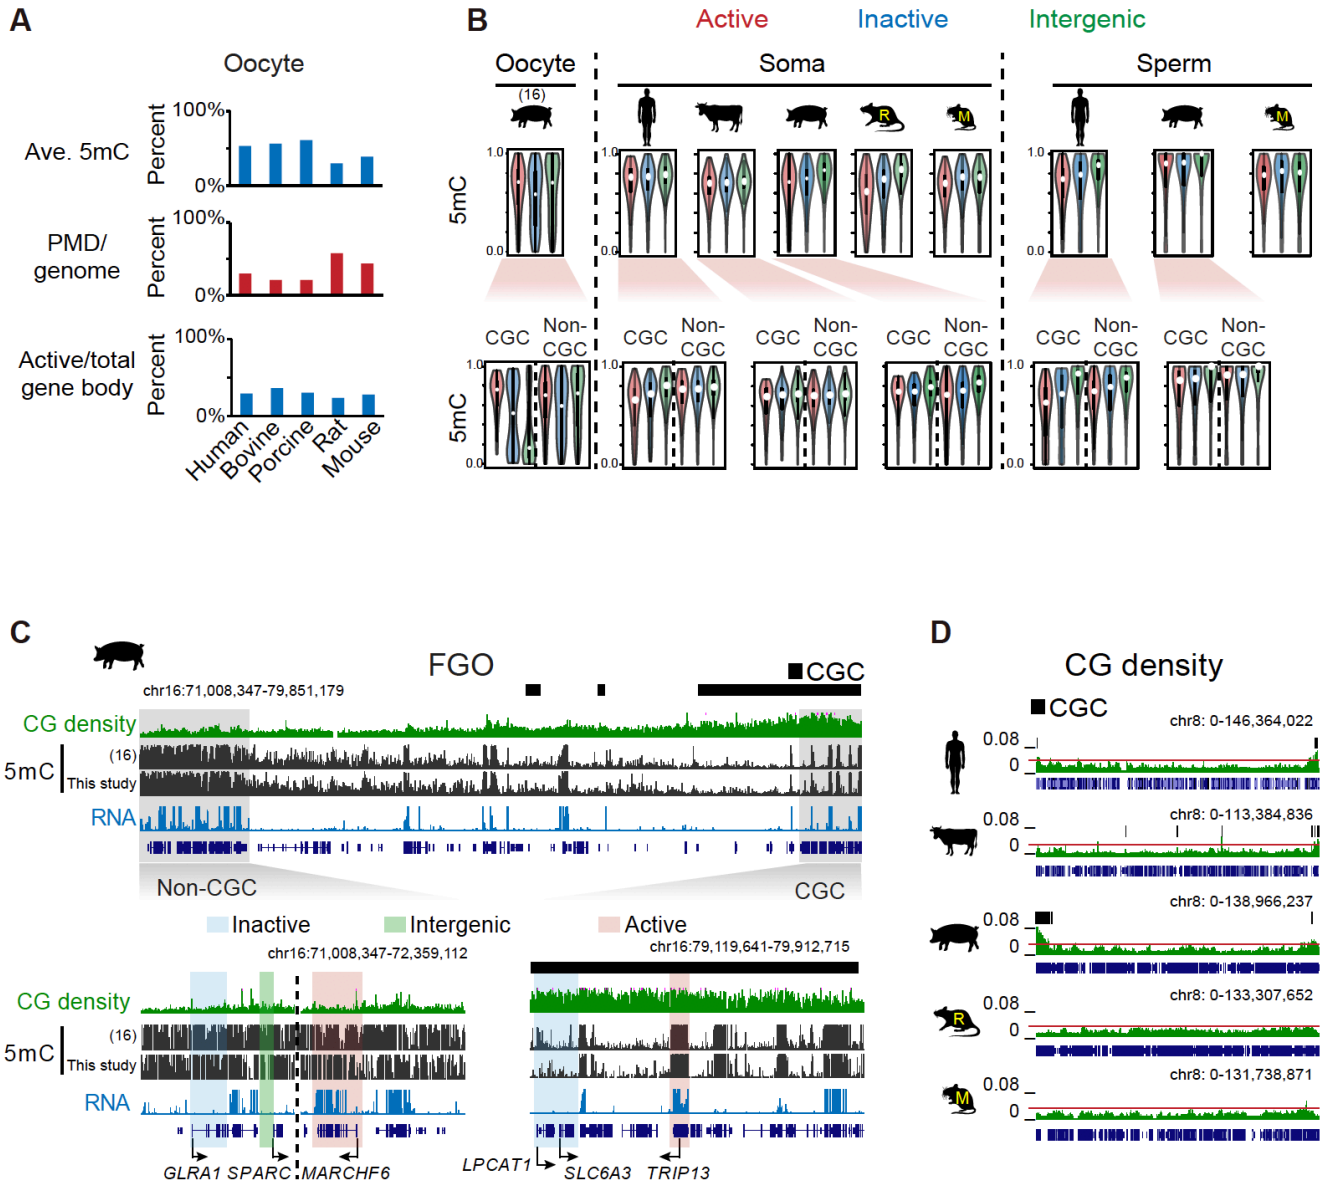

**Figure S7. DNA methylation and CpG continents (CGCs) in mammalian oocytes.** (A) Barplots showing the global DNA methylation (5mC) levels (top), PMD coverages (middle) and the percentages of active/total gene body (bottom) in the oocytes of human, bovine, porcine, rat and mouse. (B) Top, violin plots showing the DNA methylation levels in active gene bodies (red), inactive gene bodies (blue), and intergenic regions (green) in porcine oocytes, somatic tissues (Soma) in the five species, and sperm in human, porcine and mouse. Bottom, similar analyses were conducted for CGC and non-CGC regions in corresponding tissues/cells (top) in human, bovine and porcine. Data resources used in this analysis: porcine MII oocytes (16); human liver (73); bovine lung (74); rat left ventricle (75); mouse cerebellum (76); human sperm (24); porcine sperm (16); mouse sperm (81). (C) The UCSC genome browser views showing DNA methylation states in CGC (right) and non-CGC (left) regions in porcine FGOs. Active gene bodies, inactive gene bodies and intergenic regions are shaded. Data from (16) are included as a positive control. (D) The UCSC genome browser views showing the CG density across the entire chromosome (chr8) among the five species. CGCs are shown. The red line indicates the cutoff (0.03) for CGCs.

Figure S8

A

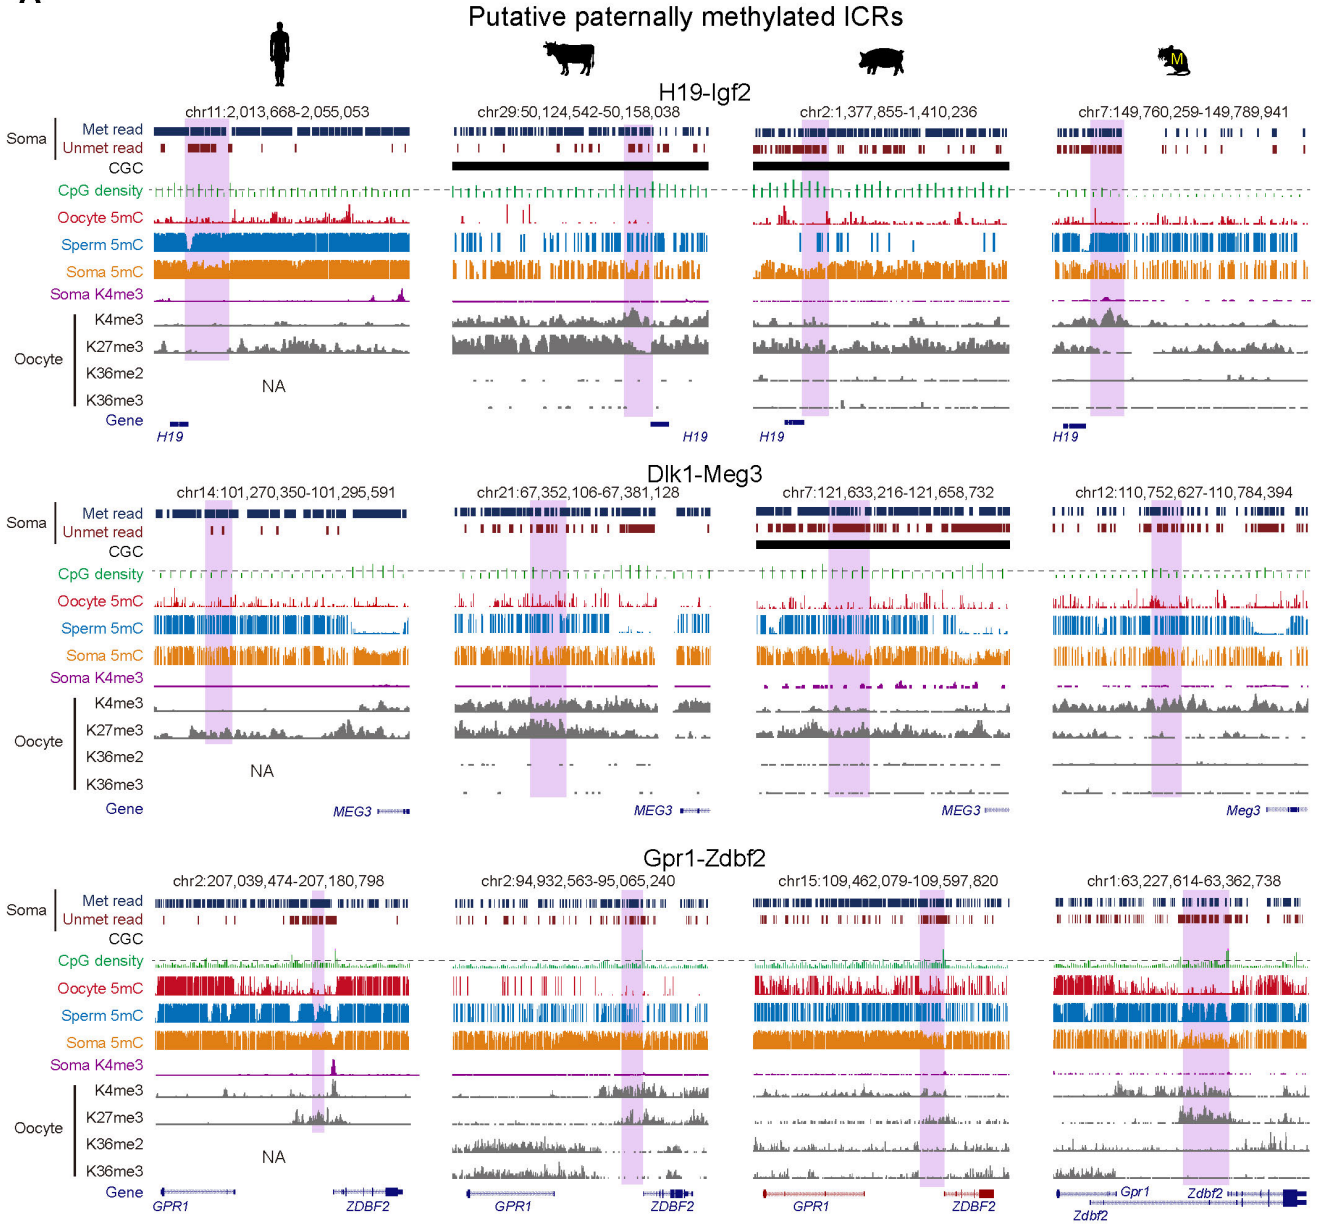

**B****Putative maternally methylated ICRs**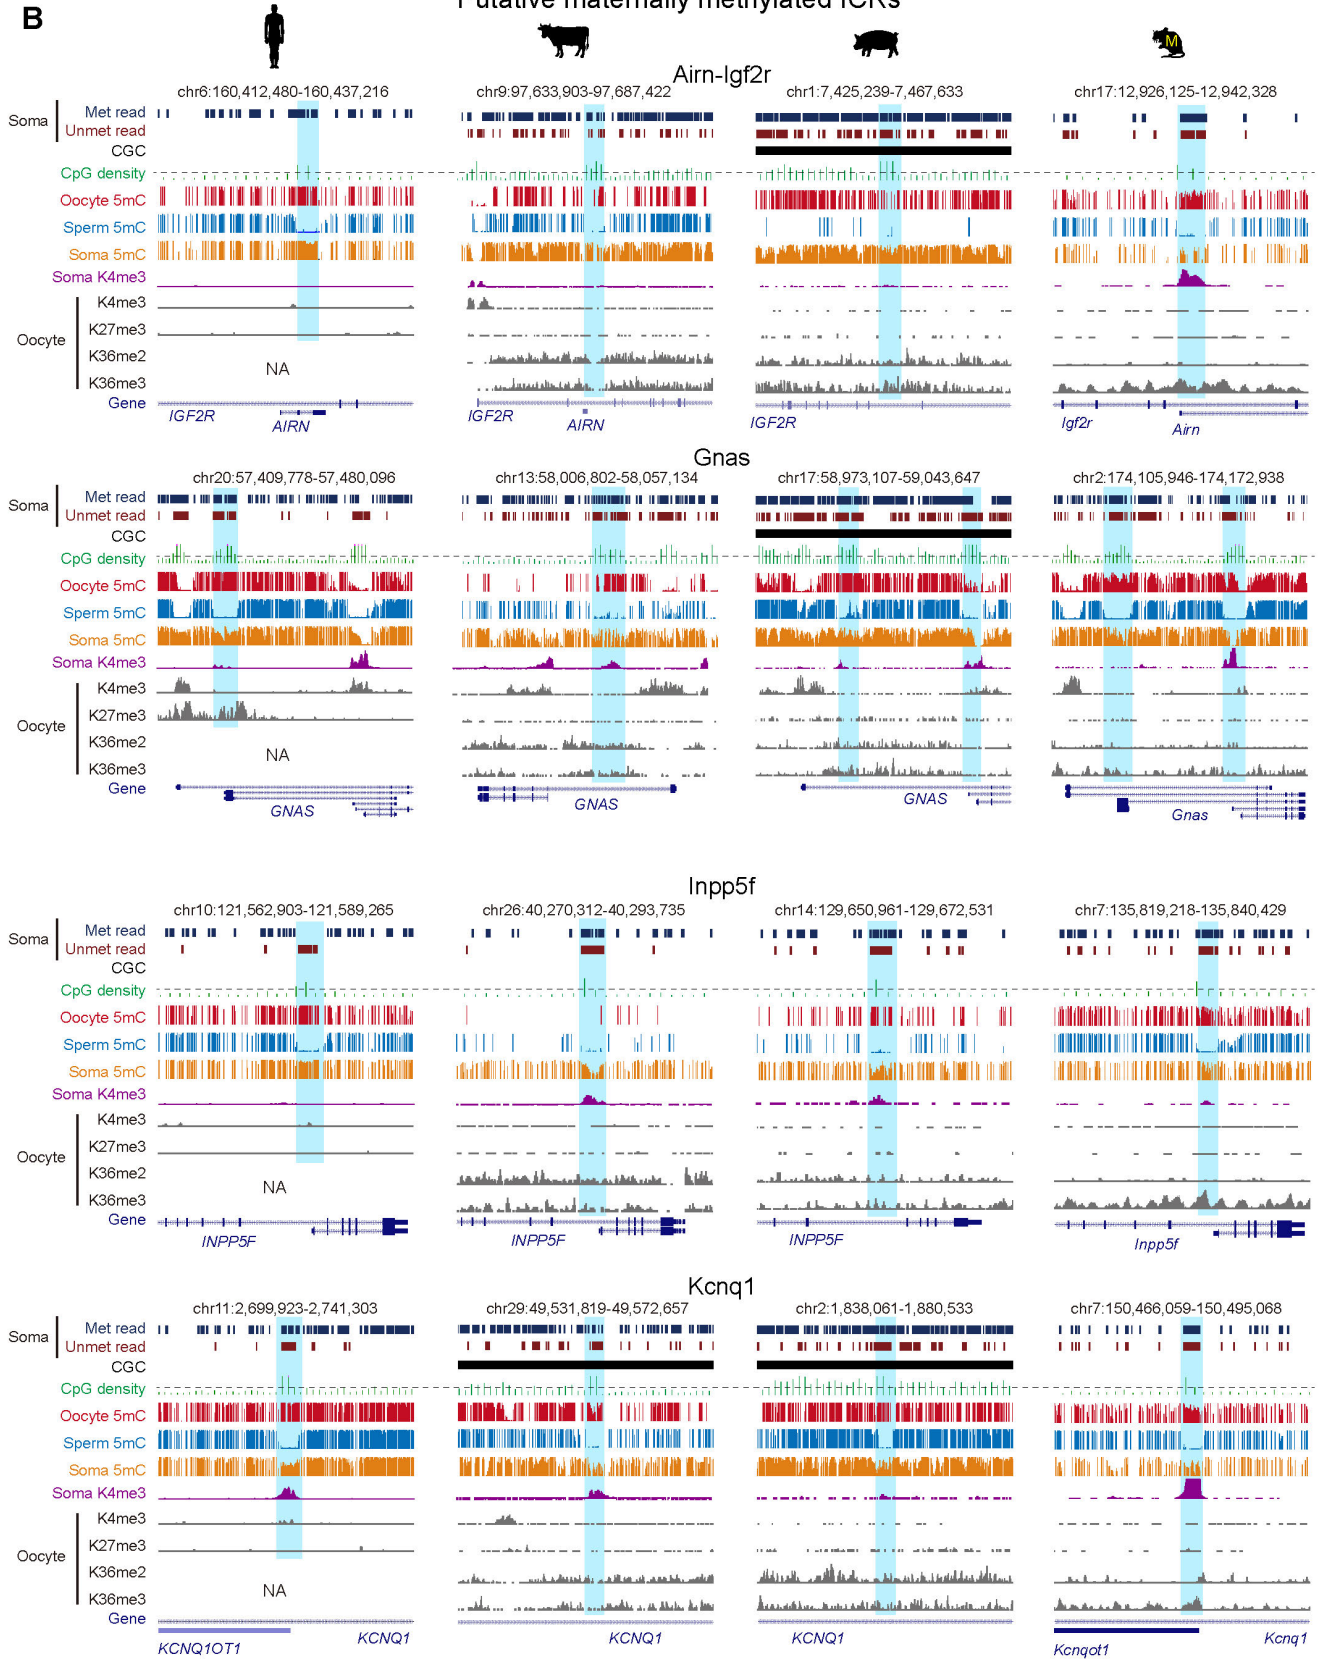

Putative maternally methylated ICRs (continued)

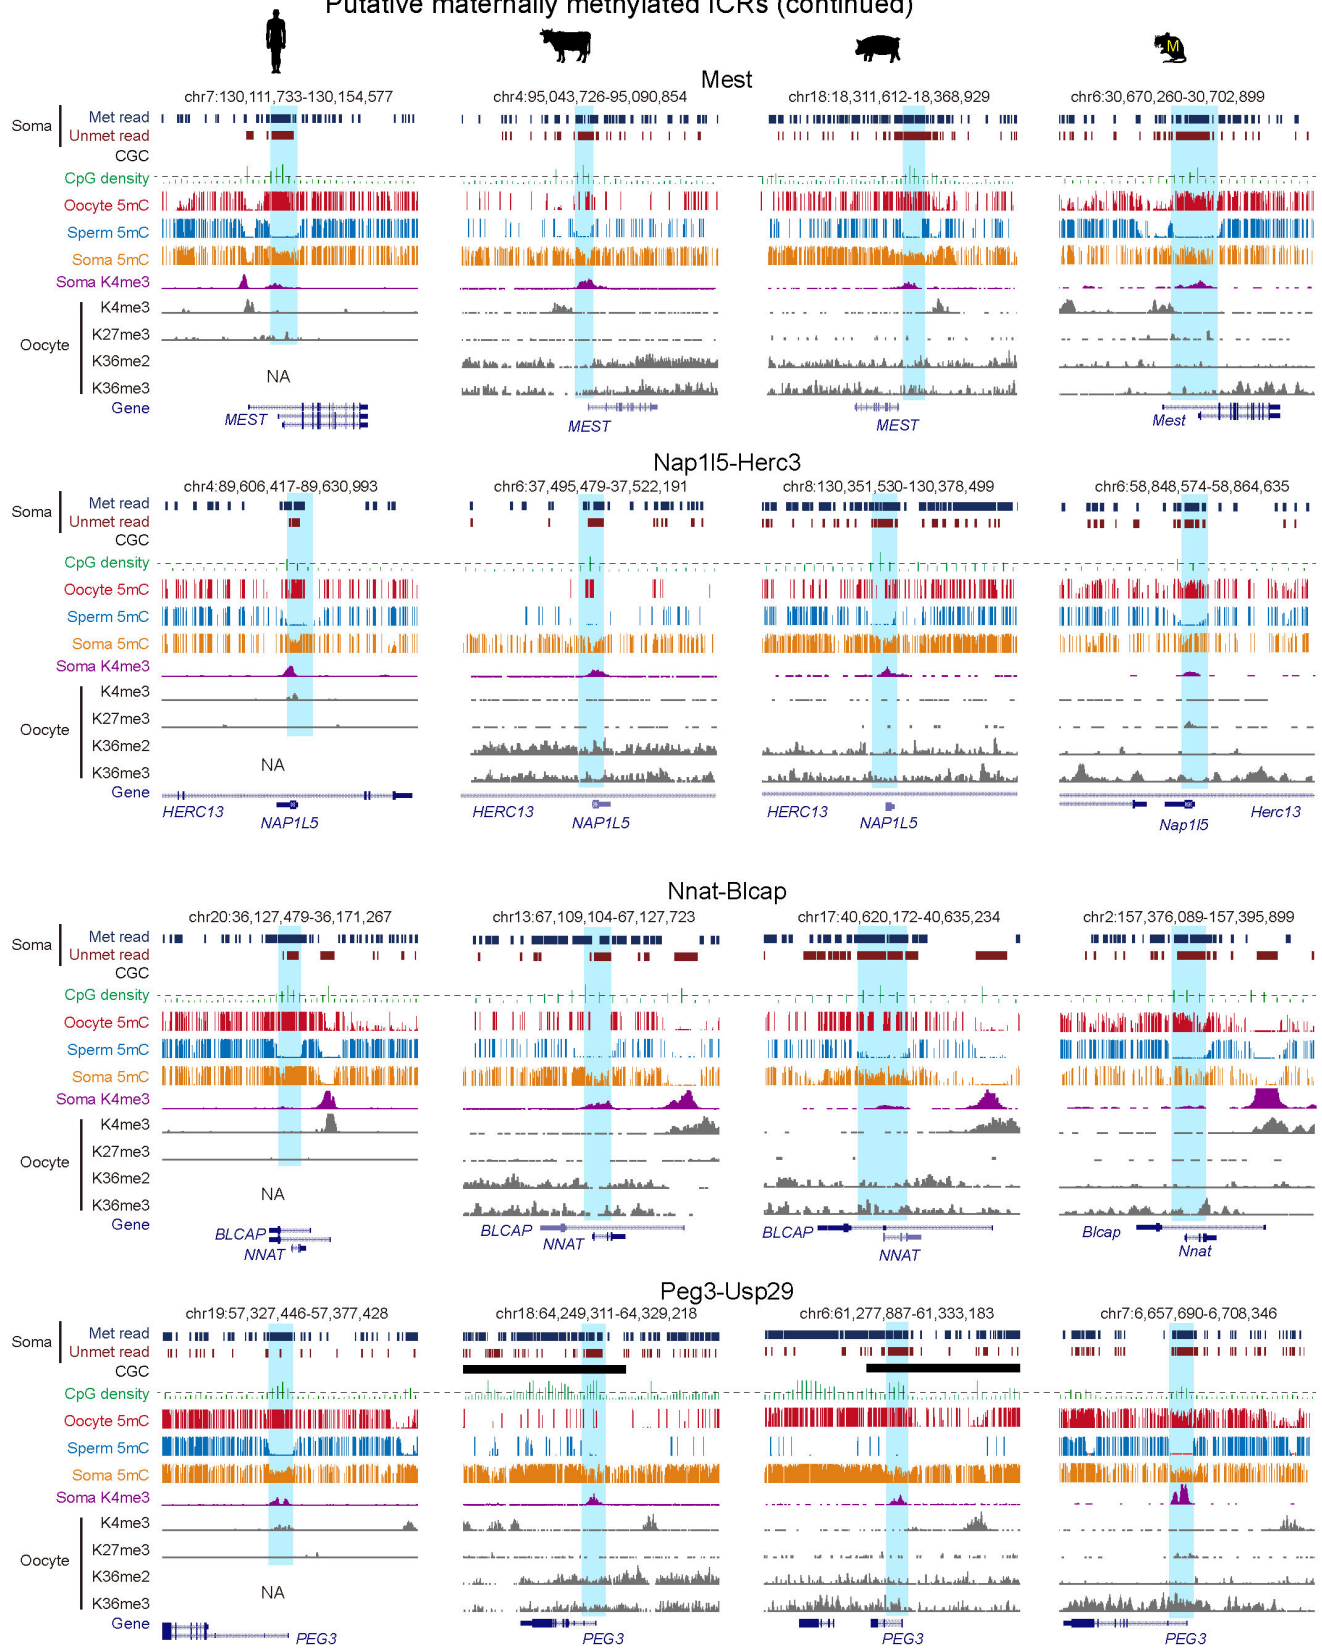



Putative maternally methylated ICRs (continued)

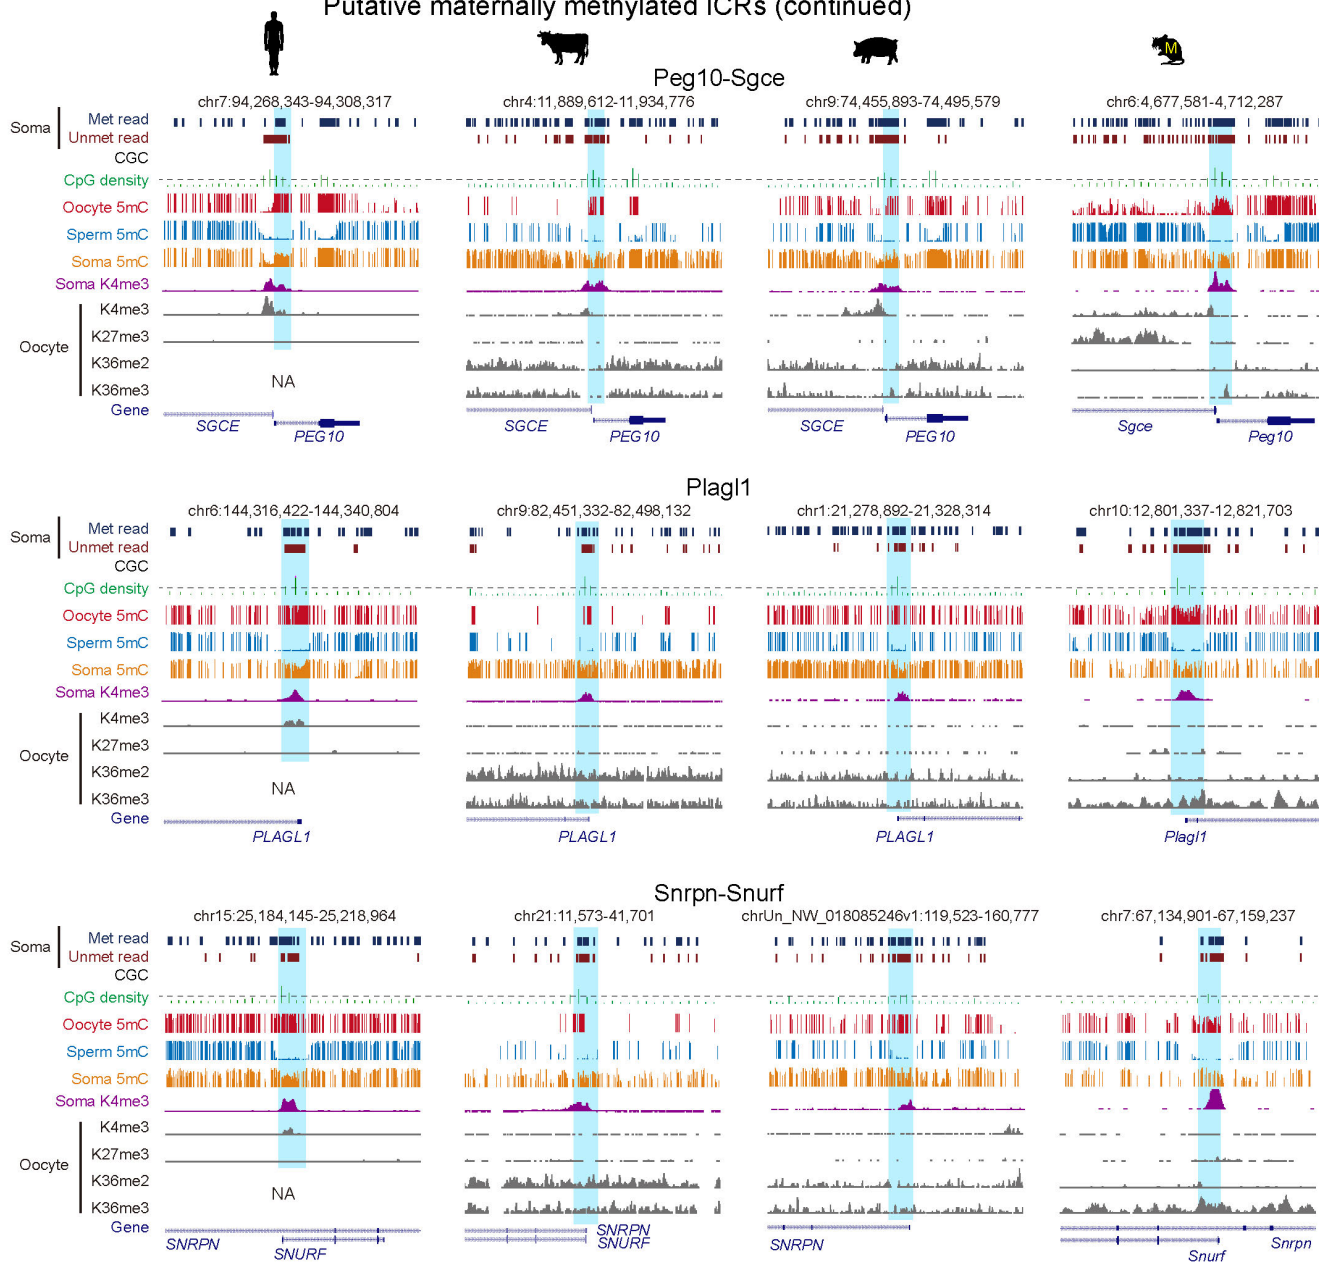

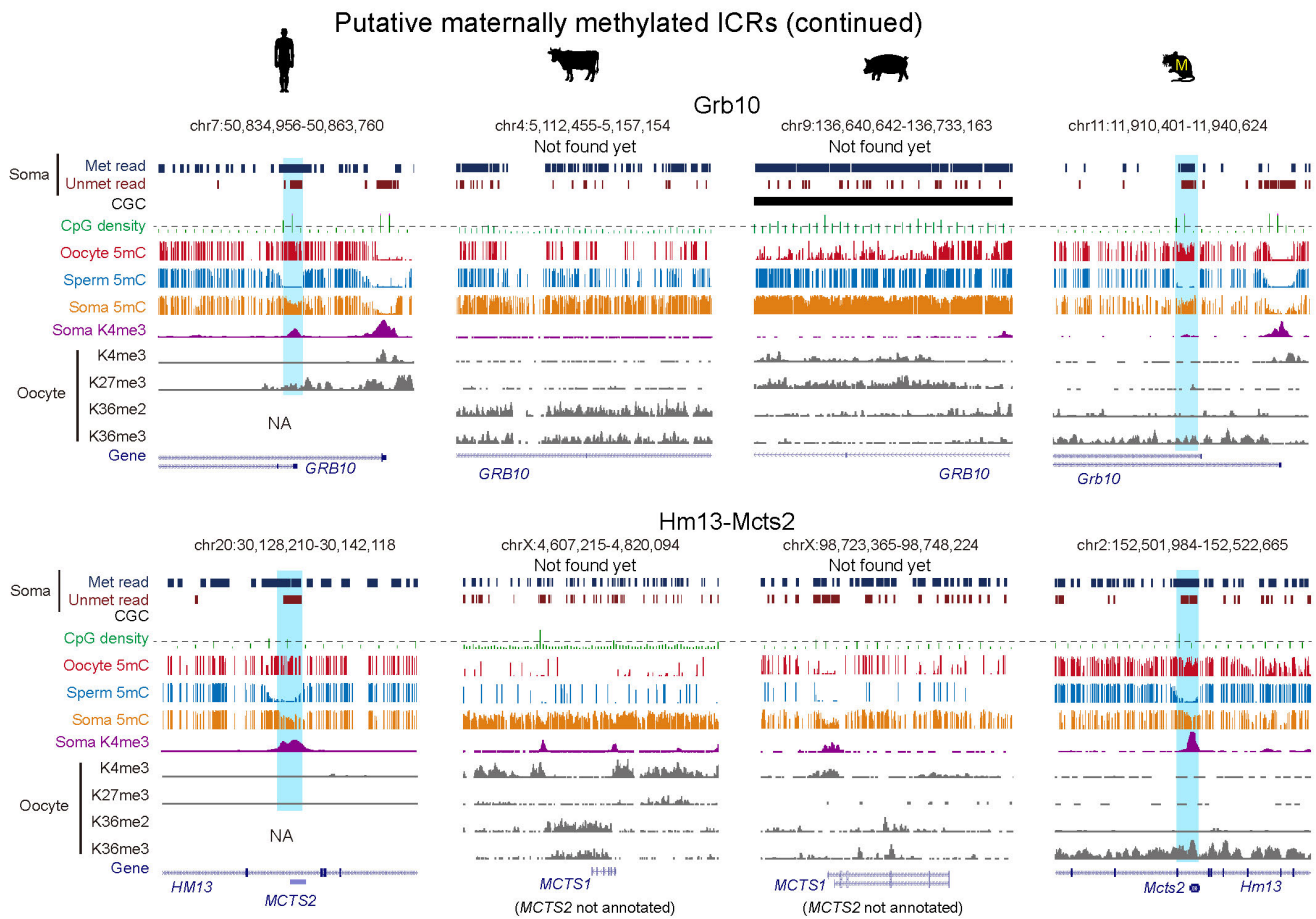

**Figure S8. The putative paternal and maternal ICRs and their relationship with CGCs in bovine and porcine.** The UCSC genome browser view showing the putative paternal (A, shaded in purple) and maternal (B, shaded in light blue) ICRs in bovine and porcine. Only germline ICRs conserved in mouse and human were considered. ICR positions for human and mouse were obtained from previous studies and related data were independently processed in this study (24, 35). The *GRB10* and *HM13-MCTS2* ICRs in bovine and porcine were not found yet. Only *MCTS1*, but not *MCTS2*, is annotated and is shown in bovine and porcine. CGC, CpG density (1 kb bin), DNA methylation (5mC) in oocyte, sperm and somatic tissues (Soma) (human: liver (73); bovine: lung (74); porcine: muscle (78); mouse: liver (76)), H3K4me3 (K4me3), H3K27me3 (K27me3), H3K36me2 (K36me2) and H3K36me3 (K36me3) in oocyte around these ICRs are shown. The dashed lines for CG density indicate the cutoff of 0.03 (100 kb bin) used for calling CGCs. Met read, reads with all CpGs (at least 3) methylated; Unmet read, reads with all CpGs (at least 3) unmethylated (human: liver; bovine: lung; porcine: muscle; mouse: liver).

Figure S9

A

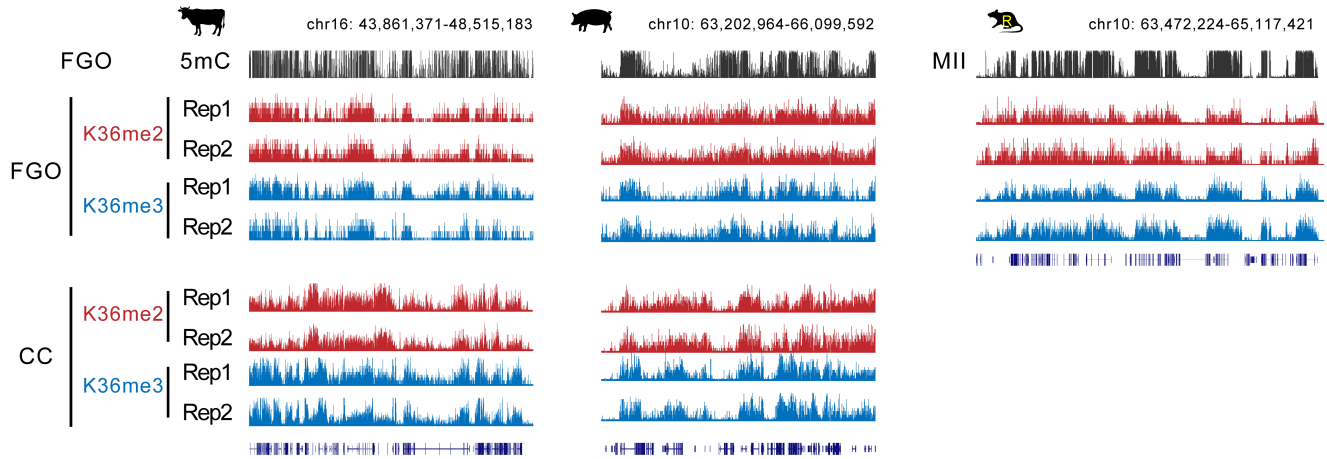

B

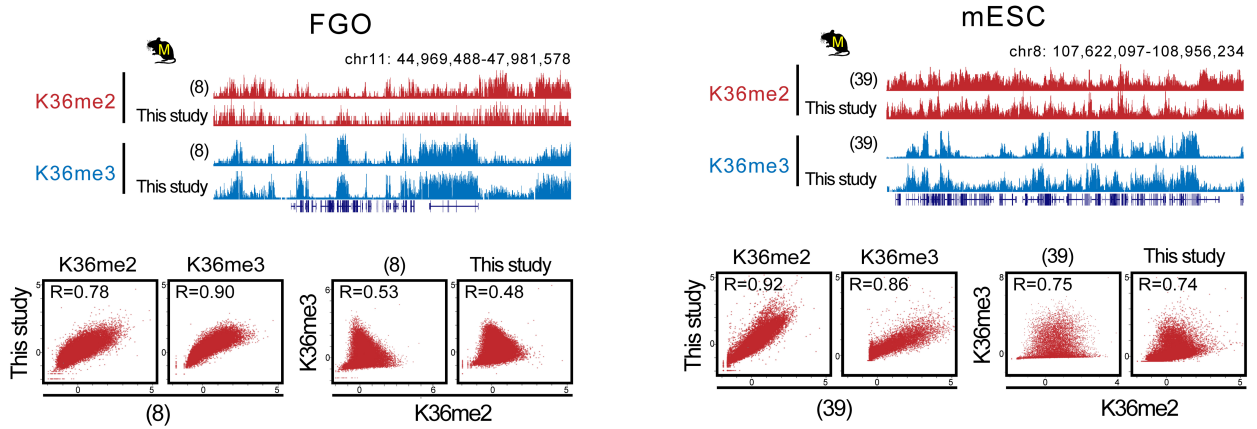

C

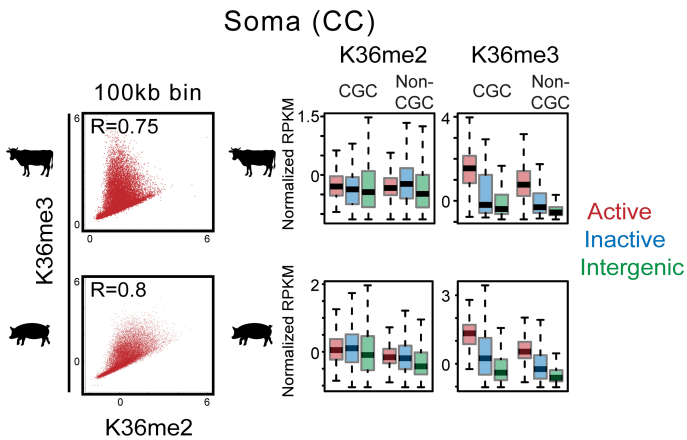

**Figure S9. H3K36me2 and H3K36me3 in the oocytes and somatic cumulus cells (CCs) across mammals.** (A) UCSC genome browser views showing DNA methylation (5mC) in oocytes, two replicates of H3K36me2 (K36me2) and H3K36me3 (K36me3) in FGOs of bovine, porcine and rat. H3K36me2 and H3K36me3 in cumulus cells (CCs) for bovine and porcine are also shown. (B) The UCSC genome browser views (top) and scatterplots (bottom) showing the comparison of H3K36me2 and H3K36me3 patterns in mouse FGOs in this study and a previous study (8), or in mESCs in this study and a previous study (39). Scatterplots comparing H3K36me2 and H3K36me3 from the same study are also shown. Data from previous studies were downloaded and processed independently in this study. (C) Scatterplots comparing H3K36me2 and H3K36me3 in CCs for bovine and porcine (left). Boxplots showing the enrichment of H3K36me2 and H3K36me3 in active gene bodies (red), inactive gene bodies (blue), and intergenic regions (green) in CGCs and non-CGCs in CCs for bovine and porcine.



# Figure S10

A

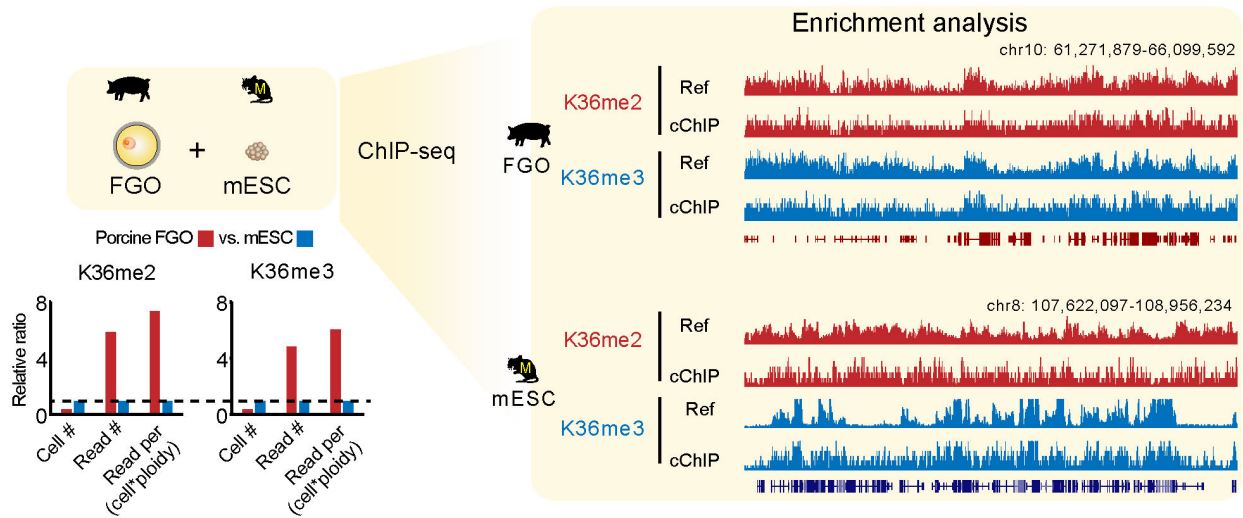

B

Porcine FGO vs. mESC

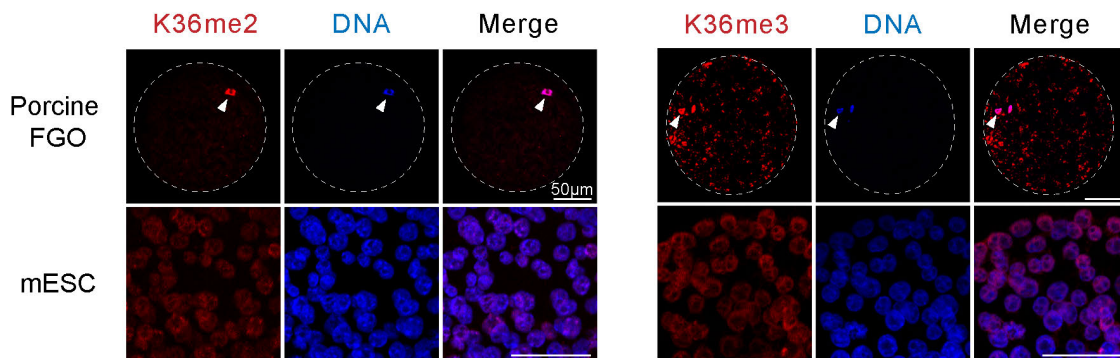

**Figure S10. Validation of H3K36me2 and H3K36me3 in porcine oocytes.** (A) Competitive and calibrated ChIP-seq (cChIP) result of H3K36me2 (K36me2) and H3K36me3 (K36me3) for porcine FGOs, with mESCs as references. A total of 100 FGOs (2n, 4C) and 250 mESCs (2n, 2C) were mixed and subjected to STAR ChIP-seq for H3K36me2 and H3K36me3. Sequencing reads were mapped separately to mouse and porcine genomes. Barplots showing the comparison of cell numbers, read numbers, read per (cell number\*ploidy) between porcine FGOs and mESCs (set as 1). UCSC genome browser views (right) showing the comparison of H3K36me2 and H3K36me3 patterns in porcine FGOs and mESCs obtained from pure samples (Ref) or mixed samples (cChIP). (B) Immunofluorescent staining showing the abundance of H3K36me2 and H3K36me3 in porcine FGOs and mESCs. The oocytes are circled by white dashed lines. White arrows indicate the nuclei of porcine FGOs. Bar=50 µm.

# Figure S11

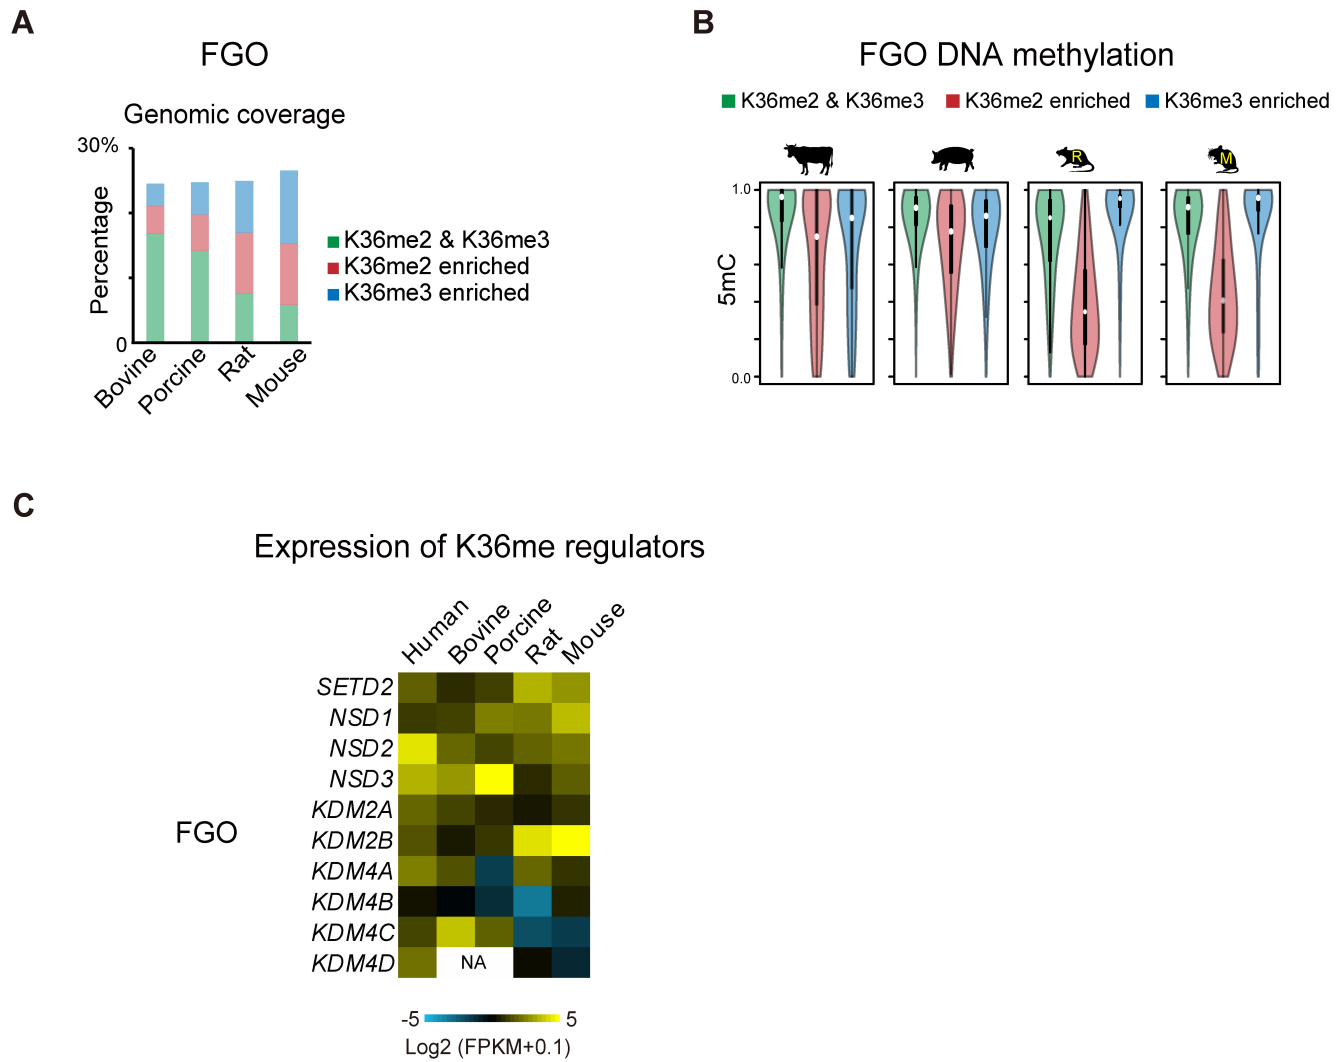

**Figure S11. H3K36me2- and H3K36me3-correlated DNA methylation in the oocytes across mammals.** (A) Barplot showing the percentages of the genome enriched by H3K36me2 (red), H3K36me3 (blue) or both H3K36me2 and H3K36me3 (green) in the oocytes of different species. (B) Violin plots showing the DNA methylation levels at regions enriched by H3K36me2 (K36me2 enriched, red), H3K36me3 (K36me3 enriched, blue) or both H3K36me2 and H3K36me3 (K36me2 & K36me3, green) in the oocytes across mammals. (C) Heatmap showing the expression of H3K36me2/3 regulators in the oocytes across the five species.

Figure S12

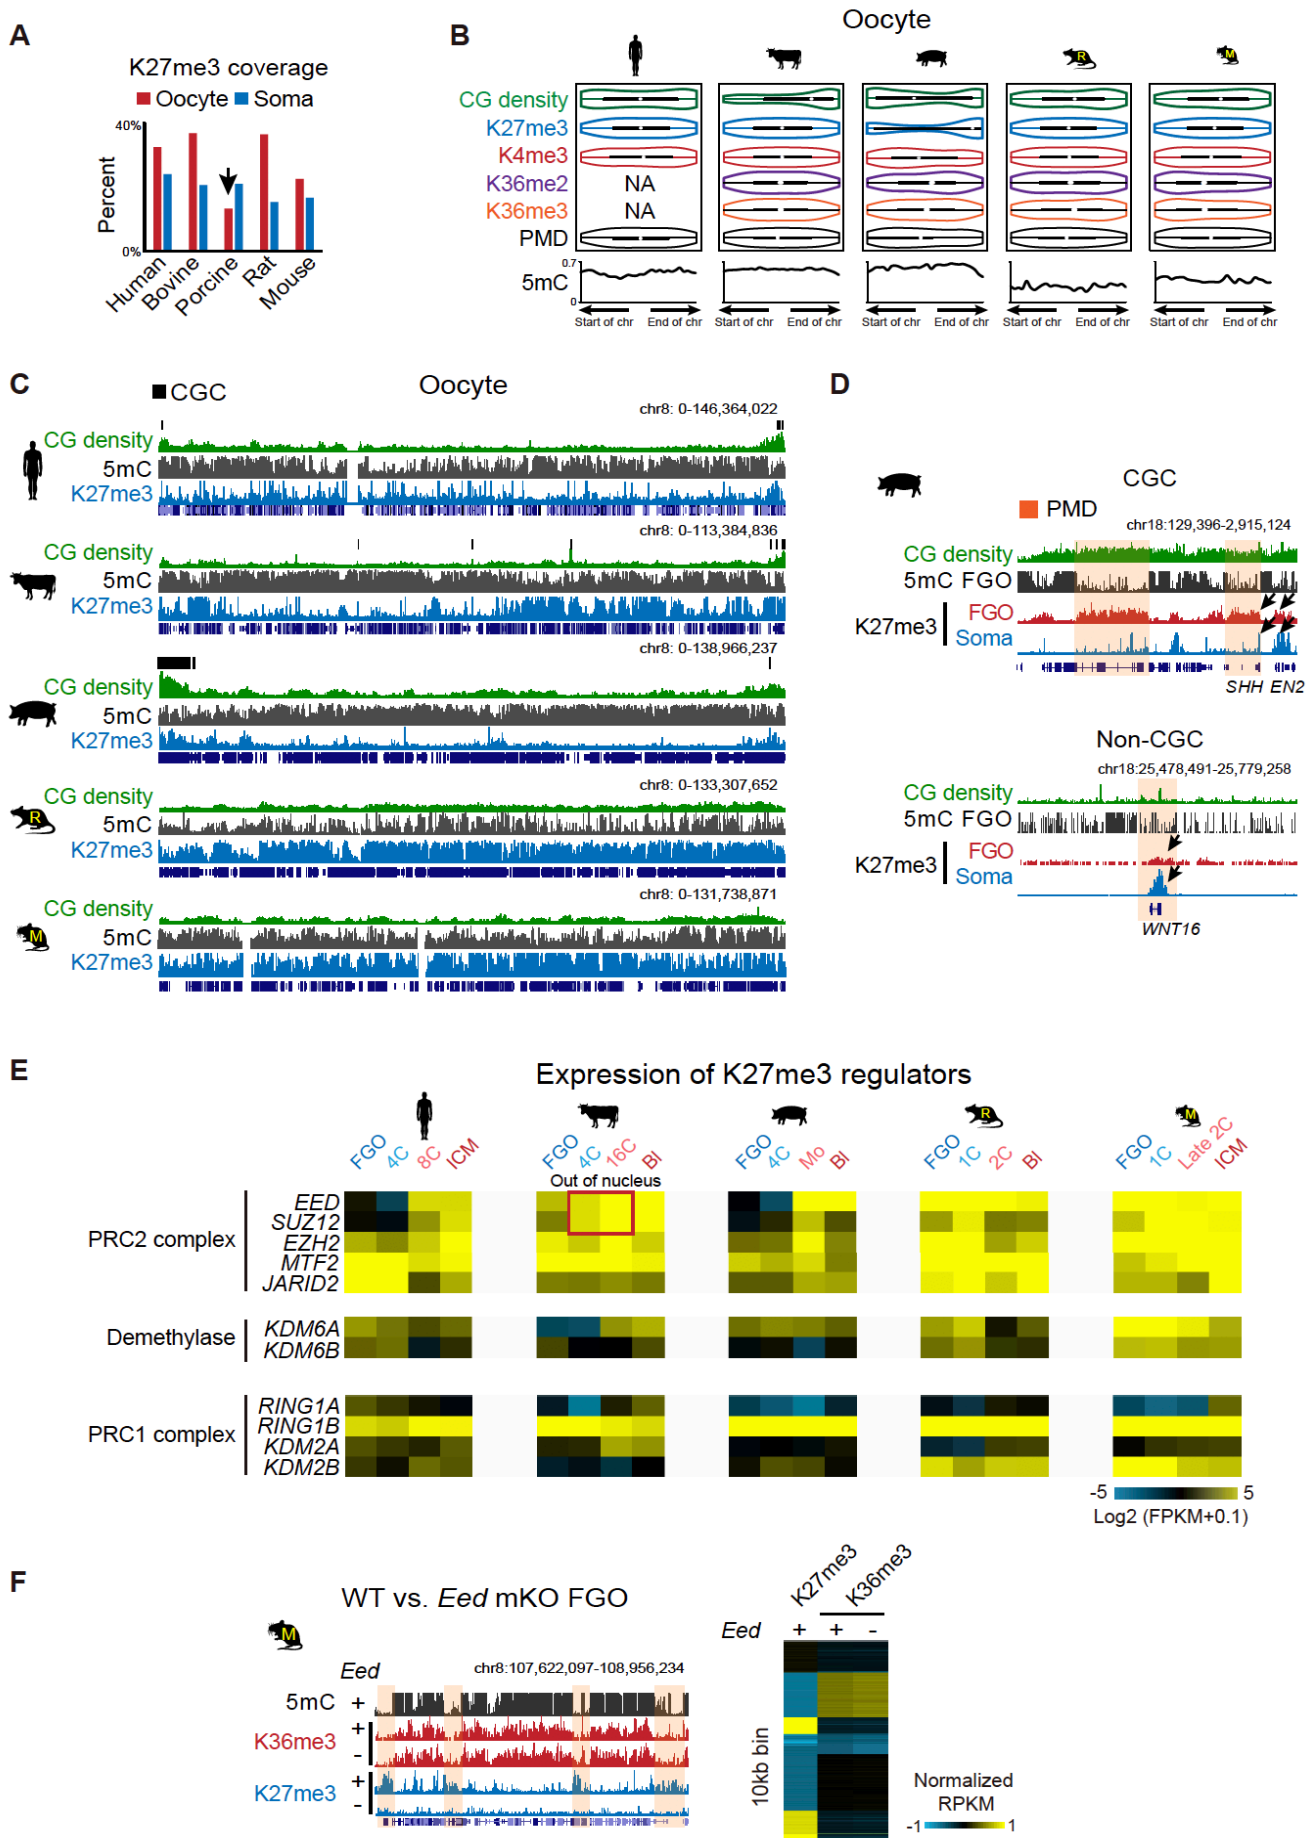

**Figure S12. H3K27me3 and its relationship with other epigenetic marks in mammalian oocytes.** (A) Bar chart showing the percentages of the genome covered by H3K27me3 (K27me3) in the oocytes among different species. The somatic tissues (Soma) in each species are also similarly analyzed as controls. Arrow indicates the relatively lower genome coverage of H3K27me3 in porcine FGOs. (B) Violin plots showing the distribution of CpG density, H3K27me3, H3K4me3 (K4me3), H3K36me2 (K36me2), H3K36me3 (K36me3), PMDs and DNA methylation (5mC) along all chromosomes in the oocytes of all five species. (C) UCSC browser views showing H3K27me3 on the whole chromosome 8 in the oocytes of all five species. The DNA methylation and CG density are also shown. (D) UCSC browser views showing H3K27me3 in CGCs (left) and non-CGCs (right) in porcine FGOs and somatic cells (Soma). DNA methylation and CG density are also shown. (E) Heatmaps showing the expression of H3K27me3 regulators in the oocyte and during the preimplantation development of the five species. Note *EED* and *SUZ12* are expressed but are excluded from nucleus before the morula stage in bovine (30) (red box). (F) UCSC browser views (top) and heatmap (bottom, 10kb bin) showing the H3K36me3 in wild type (+) and maternal *Eed* knockout (-) mouse FGOs. H3K27me3 in wild type FGOs is also shown.

Figure S13

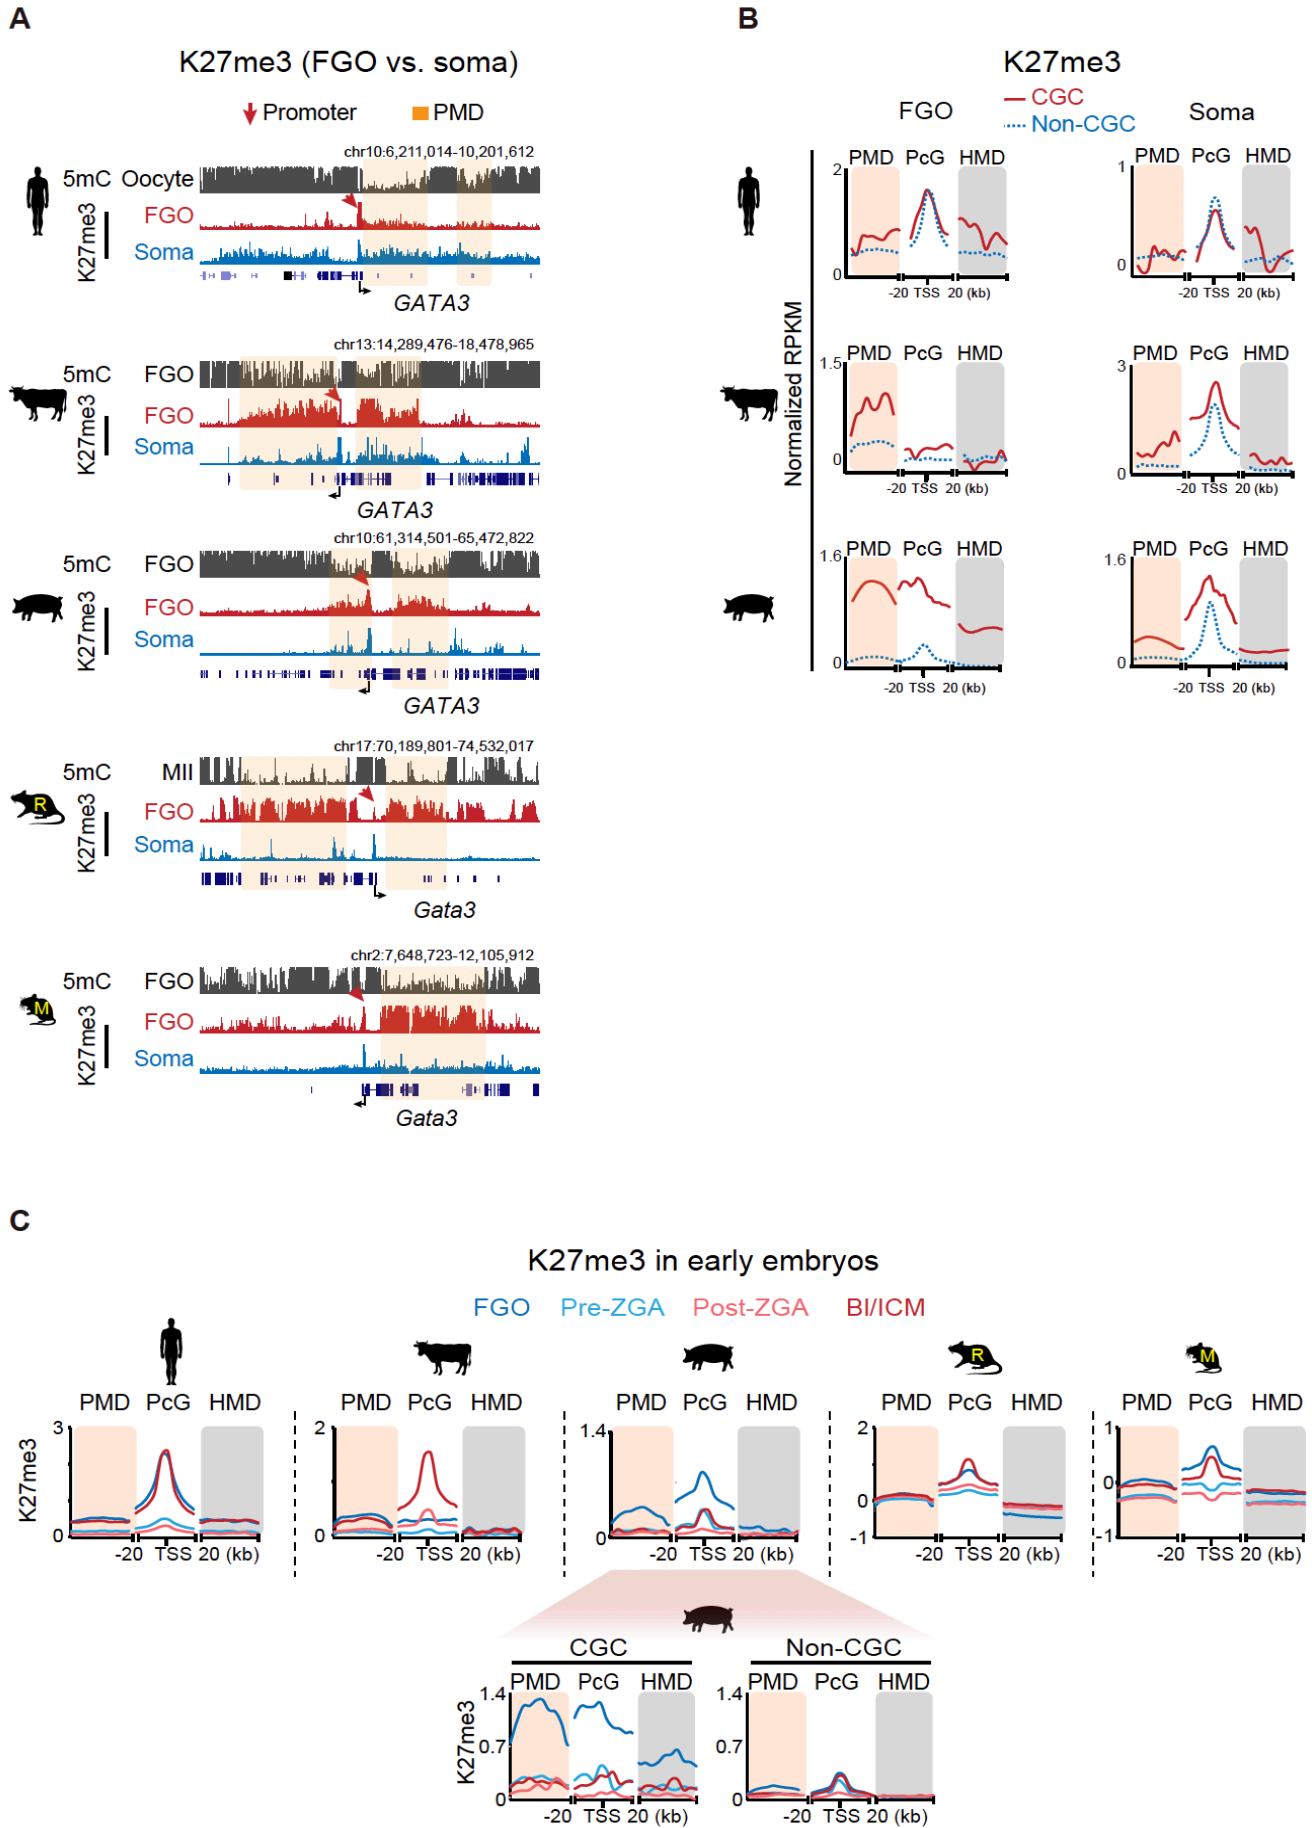

**Figure S13. H3K27me3 in mammalian oocytes and preimplantation embryos.** (A) UCSC genome browser views showing H3K27me3 (K27me3) enrichment around the *Gata3* loci in the FGOs of all five species. DNA methylation in oocytes and H3K27me3 in somatic tissues (Soma) are also shown. (B) Metaplots showing H3K27me3 enrichment in PMDs, Polycomb group target gene (PcG) promoters (TSS  $\pm$  20kb) and HMDs in CGC (red) and non-CGC (blue) regions in FGOs (left) and somatic tissues (Soma, right) for human, bovine and porcine. (C) Metaplots showing the enrichment of H3K27me3 in PMDs, PcG promoters and HMDs in FGOs and early embryos among the five species (top). CGCs and non-CGCs for porcine are also separately analyzed (bottom). FGO, full-grown oocyte; Bl, blastocyst; ICM, inner cell mass; PMD, partially methylated domain; PcG, Polycomb group gene, HMD, highly methylated domain. CGC, CpG content.

Figure S14

A

K4me3 and K27me3 in PMD

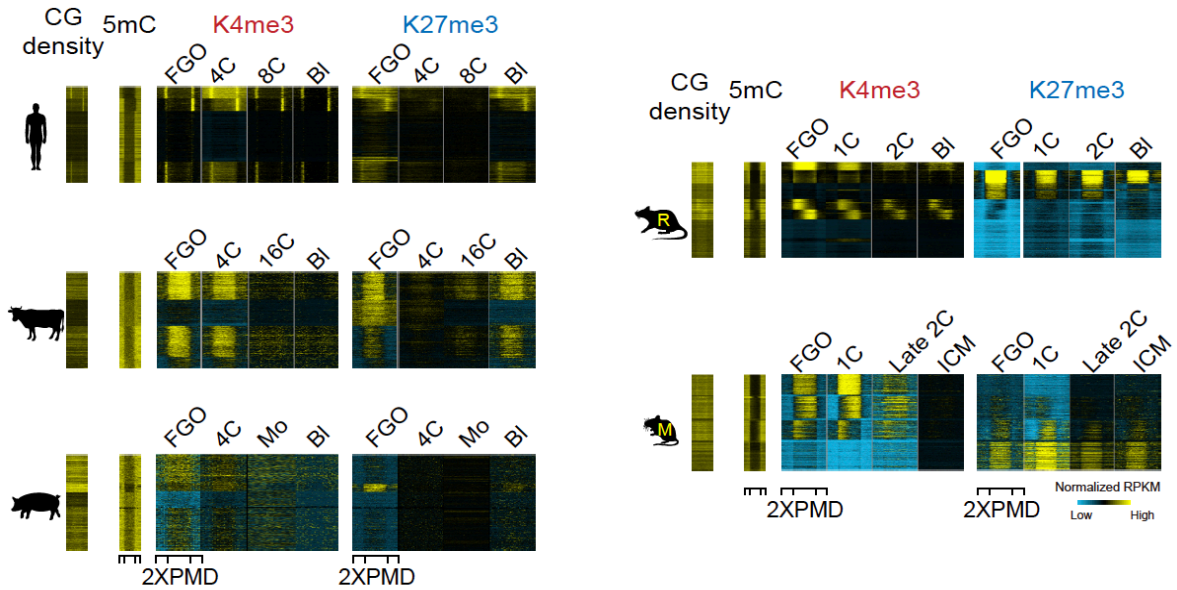

B

Developmental genes

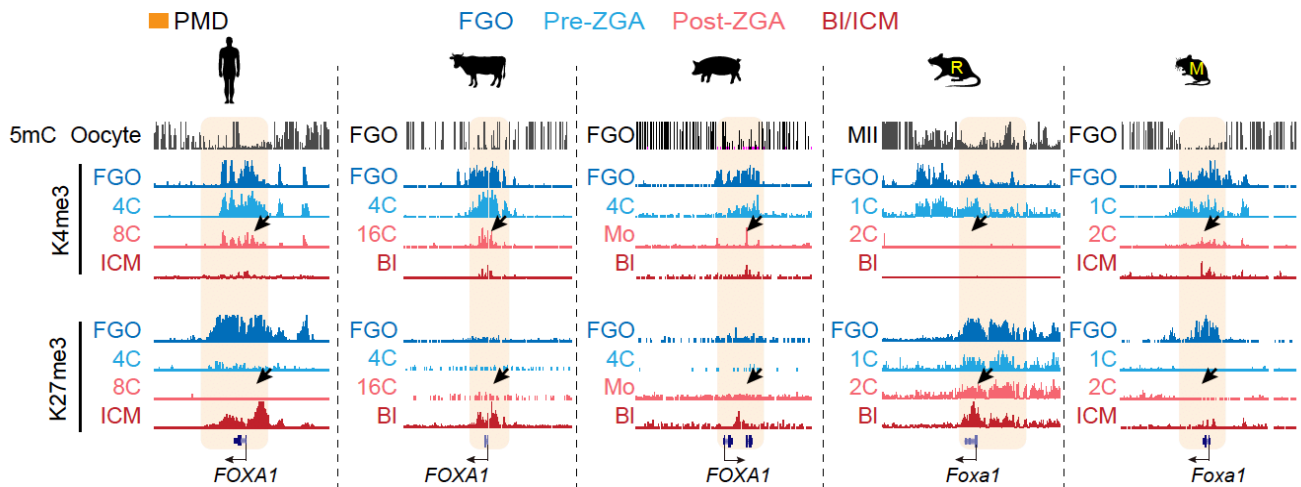

C

Developmental genes

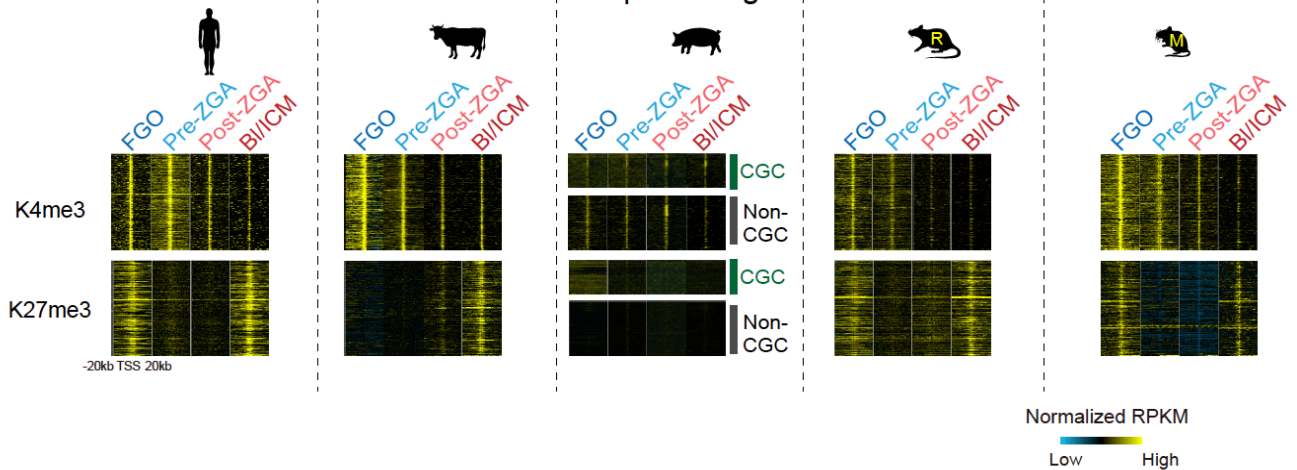

**Figure S14. Dynamics of bivalency at PMD and developmental gene promoters during mammalian preimplantation development.** (A) Heatmaps showing the enrichment of H3K4me3 and H3K27me7 in the PMDs of mammalian oocytes and their dynamics during mammalian early development. CG density and DNA methylation in PMDs are also shown. FGO, full-grown oocyte; PMD, partially methylated domain; HMD, highly methylated domain; 1C, 1-cell embryo; 2C, late 2-cell embryo; 4C, 4-cell embryo; 8C, 8-cell embryo; 16C, 16-cell embryo; Mo, morula; Bl, Blastocyst; ICM, inner cell mass. (B) UCSC genome browser views showing the dynamics of H3K4me3 (K4me3) and H3K27me3 (K27me3) marks at a representative bivalent gene *Foxa1* during preimplantation development of the five species. The arrows indicate the promoter regions at ZGA. The PMD regions are shaded. (C) Heatmaps showing the enrichment of H3K4me3 and H3K27me3 marks at bivalent genes from FGO to blastocyst in the five species. Developmental genes are identified in the pluripotent stem cells of each species (Materials and Methods).



Figure S15

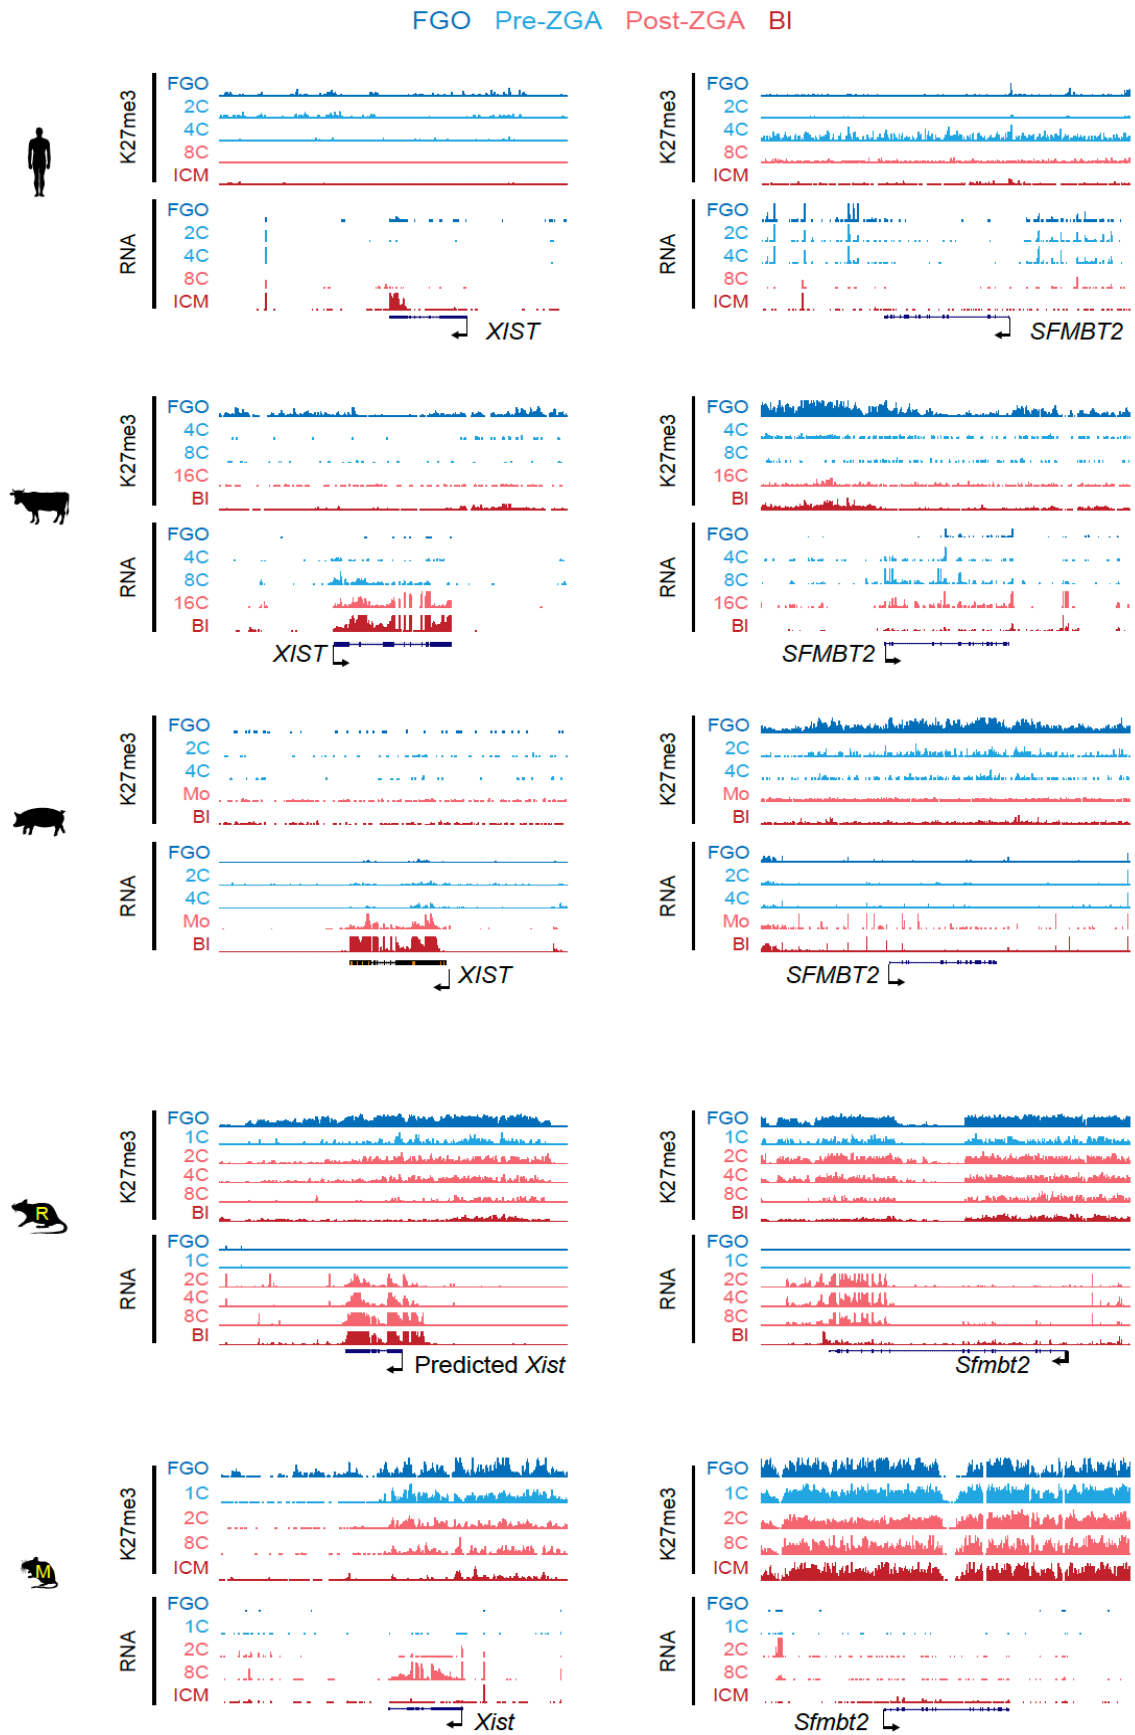

**Figure S15. H3K27me3 and gene expression at the *Xist* and *Sfmbt2* loci during preimplantation development among different species.** The UCSC genome browser views showing the enrichment of H3K27me3 (K27me3) and gene expression at *Xist* and *Sfmbt2* loci from FGO to blastocyst in different species. Note the absence of H3K27me3 signals at these two gene loci by ZGA in non-rodents.

# Figure S16

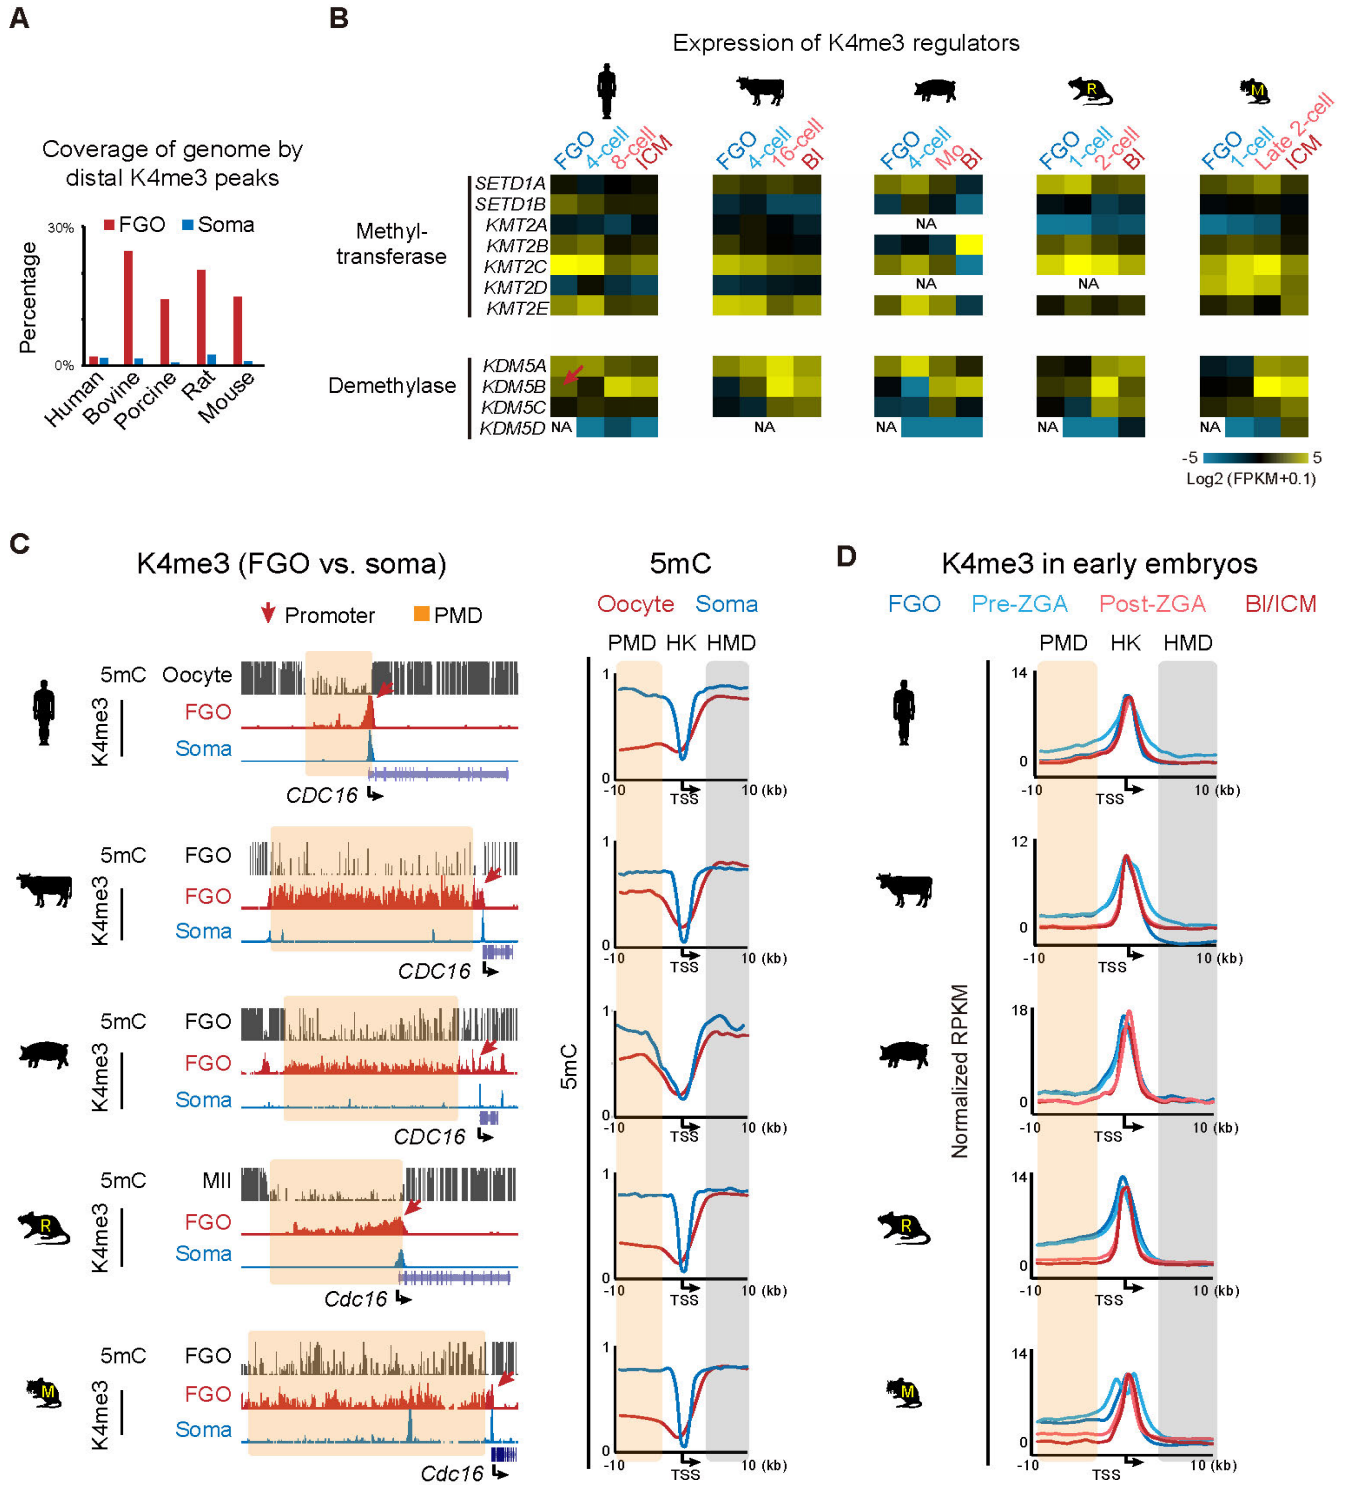

**Figure S16. H3K4me3 in mammalian oocytes and preimplantation embryos.** (A) Barplot showing the genome coverage of distal H3K4me3 (K4me3) peaks in oocyte genomes among different species. Analysis results for the somatic tissues (Soma) in each species are shown as controls. (B) Heatmaps showing the expression of H3K4me3 (K4me3) regulators in the oocyte and during the preimplantation development of the five species. Red arrow notes the selective expression of *KDM5B* in the oocytes of human but not other species. (C) Left, UCSC genome browser views showing the enrichment of H3K4me3 (K4me3) at the promoter (*Cdc16*) and PMD regions in FGOs of all the five species. H3K4me3 at the promoters and PMD regions are indicated by arrows and shades, respectively. Similar analyses for somatic tissues or cells are shown as controls. Right, metaplots showing the DNA methylation (5mC) at PMDs, promoters, and HMDs around HK genes that have upstream PMDs in oocytes among the five species oocytes (red line). The somatic tissue (blue line) in each species is similarly analyzed as a control. (D) Metaplots showing the enrichment of H3K4me3 in PMDs, housekeeping gene promoters (TSS  $\pm$  2.5kb) and HMDs in FGOs and early embryos among the five species.

Figure S17

A

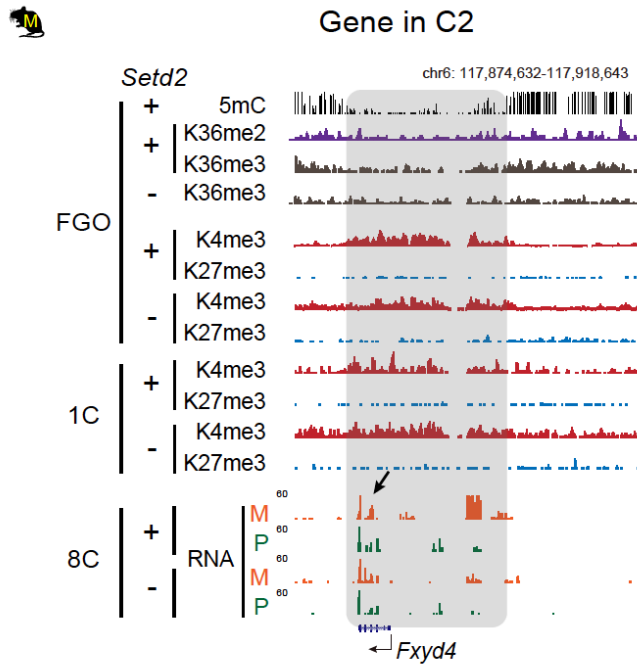

B

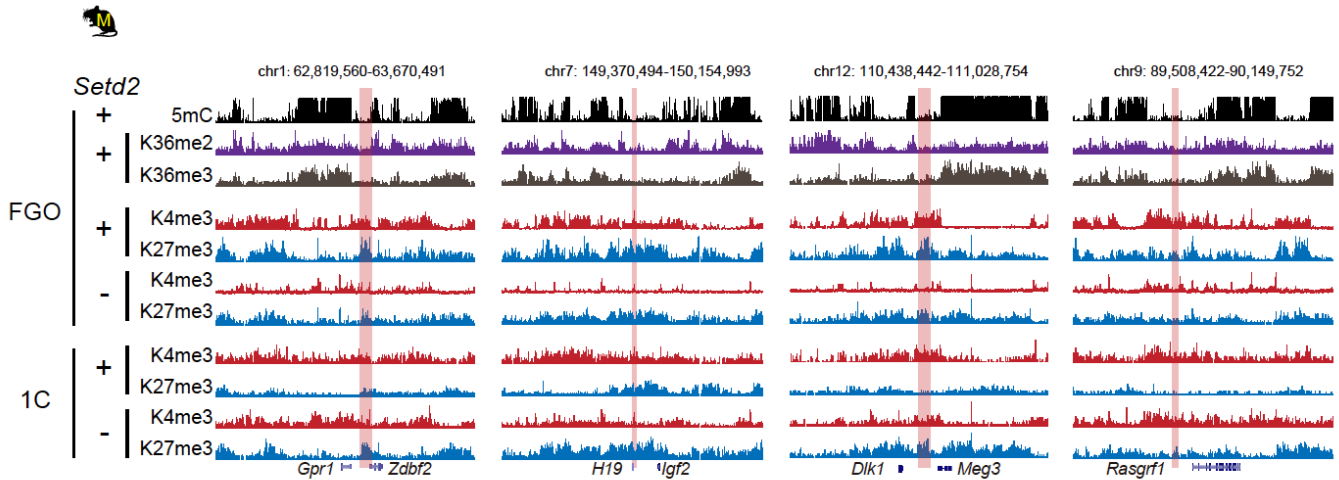

C

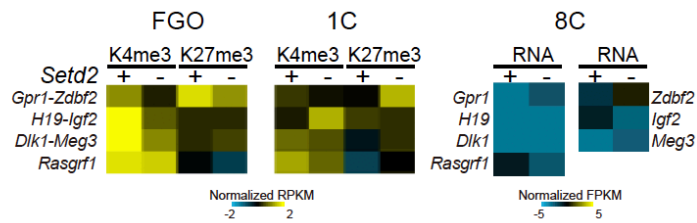

**Figure S17. Exclusion of oocyte nH3K27me3 from nH3K4me3 domains in rodents.** (A) The UCSC genome browser view showing the distribution of H3K36me2 (K36me2), H3K36me3 (K36me3), H3K4me3 and H3K27me3 (K27me3), and the maternal and paternal RNA read count signals at a representative gene in cluster 2 (C2, identified in Fig. 6h, where no H3K27me3 invasion is observed) in wild type (“+”) and maternal *Setd2* knockout (“-”) FGOs. PMD region is shaded. The arrow indicated *Fxyd4* gene locus. (B and C) The UCSC genome browser views (B) and heatmaps (C, left and middle) showing the distribution of H3K4me3 (K4me3) and H3K27me3 (K27me3) in the paternal ICRs (shaded) in wild type (“+”) and maternal *Setd2* knockout (“-”) mouse full-grown oocyte (FGO) and 1-cell (1C) embryo. DNA methylation (5mC), H3K36me2 (K36me2) and H3K36me3 (K36me3) in wild type FGO are shown in the snapshots. Expression of the paternally imprinted genes in wild type and *Setd2* mutant 8C (C, right) is shown. *Setd2* mutant 8C embryos are derived from enucleated WT oocytes transferred with *Setd2* mKO chromatin (9).

**Table S1. (separate file)**

Public data used in this study

**Table S2. (separate file)**

Information for datasets generated in this study

**Table S3. (separate file)**

Genes located in CGCs in human, bovine and porcine

**Table S4. (separate file)**

The positions of putative maternal and paternal ICRs in bovine, porcine and rat.

## REFERENCES AND NOTES

1. C. D. Allis, T. Jenuwein, The molecular hallmarks of epigenetic control. *Nat. Rev. Genet.* **17**, 487–500 (2016).
2. M. A. Eckersley-Maslin, C. Alda-Catalinas, W. Reik, Dynamics of the epigenetic landscape during the maternal-to-zygotic transition. *Nat. Rev. Mol. Cell Biol.* **19**, 436–450 (2018).
3. M. V. C. Greenberg, D. Bourc'his, The diverse roles of DNA methylation in mammalian development and disease. *Nat. Rev. Mol. Cell Biol.* **20**, 590–607 (2019).
4. T. Suganuma, J. L. Workman, Signals and combinatorial functions of histone modifications. *Annu. Rev. Biochem.* **80**, 473–499 (2011).
5. A. Jambhekar, A. Dhall, Y. Shi, Roles and regulation of histone methylation in animal development. *Nat. Rev. Mol. Cell Biol.* **20**, 625–641 (2019).
6. B. E. Bernstein, T. S. Mikkelsen, X. Xie, M. Kamal, D. J. Huebert, J. Cuff, B. Fry, A. Meissner, M. Wernig, K. Plath, R. Jaenisch, A. Wagschal, R. Feil, S. L. Schreiber, E. S. Lander, A bivalent chromatin structure marks key developmental genes in embryonic stem cells. *Cell* **125**, 315–326 (2006).
7. Y. Li, H. Sasaki, Genomic imprinting in mammals: Its life cycle, molecular mechanisms and reprogramming. *Cell Res.* **21**, 466–473 (2011).
8. K. Shirane, F. Miura, T. Ito, M. C. Lorincz, NSD1-deposited H3K36me2 directs de novo methylation in the mouse male germline and counteracts Polycomb-associated silencing. *Nat. Genet.* **52**, 1088–1098 (2020).
9. Q. Xu, Y. Xiang, Q. Wang, L. Wang, J. Brind'Amour, A. B. Bogutz, Y. Zhang, B. Zhang, G. Yu, W. Xia, Z. Du, C. Huang, J. Ma, H. Zheng, Y. Li, C. Liu, C. L. Walker, E. Jonasch, L. Lefebvre, M. Wu, M. C. Lorincz, W. Li, L. Li, W. Xie, SETD2 regulates the maternal epigenome, genomic imprinting and embryonic development. *Nat. Genet.* **51**, 844–856 (2019).
10. Z. Chen, Y. Zhang, Maternal H3K27me3-dependent autosomal and X chromosome imprinting. *Nat. Rev. Genet.* **21**, 555–571 (2020).
11. Z. Chen, Q. Yin, A. Inoue, C. Zhang, Y. Zhang, Allelic H3K27me3 to allelic DNA methylation switch maintains noncanonical imprinting in extraembryonic cells. *Sci. Adv.* **5**, eaay7246 (2019).
12. C. W. Hanna, R. Perez-Palacios, L. Gahurova, M. Schubert, F. Krueger, L. Biggins, S. Andrews, M. Colome-Tatche, D. Bourc'his, W. Dean, G. Kelsey, Endogenous retroviral insertions drive non-canonical imprinting in extra-embryonic tissues. *Genome Biol.* **20**, 225 (2019).
13. W. Xia, J. Xu, G. Yu, G. Yao, K. Xu, X. Ma, N. Zhang, B. Liu, T. Li, Z. Lin, X. Chen, L. Li, Q. Wang, D. Shi, S. Shi, Y. Zhang, W. Song, H. Jin, L. Hu, Z. Bu, Y. Wang, J. Na, W. Xie, Y. P. Sun, Resetting histone modifications during human parental-to-zygotic transition. *Science* **365**, 353–360 (2019).

14. S. Petropoulos, D. Edsgard, B. Reinius, Q. Deng, S. P. Panula, S. Codeluppi, A. P. Reyes, S. Linnarsson, R. Sandberg, F. Lanner, Single-cell RNA-seq reveals lineage and X chromosome dynamics in human preimplantation embryos. *Cell* **167**, 285 (2016).
15. P. Zhu, H. Guo, Y. Ren, Y. Hou, J. Dong, R. Li, Y. Lian, X. Fan, B. Hu, Y. Gao, X. Wang, Y. Wei, P. Liu, J. Yan, X. Ren, P. Yuan, Y. Yuan, Z. Yan, L. Wen, L. Yan, J. Qiao, F. Tang, Single-cell DNA methylome sequencing of human preimplantation embryos. *Nat. Genet.* **50**, 12–19 (2018).
16. E. Ivanova, S. Canovas, S. Garcia-Martinez, R. Romar, J. S. Lopes, D. Rizos, M. J. Sanchez-Calabuig, F. Krueger, S. Andrews, F. Perez-Sanz, G. Kelsey, P. Coy, DNA methylation changes during preimplantation development reveal inter-species differences and reprogramming events at imprinted genes. *Clin. Epigenetics* **12**, 64 (2020).
17. B. Zhang, H. Zheng, B. Huang, W. Li, Y. Xiang, X. Peng, J. Ming, X. Wu, Y. Zhang, Q. Xu, W. Liu, X. Kou, Y. Zhao, W. He, C. Li, B. Chen, Y. Li, Q. Wang, J. Ma, Q. Yin, K. Kee, A. Meng, S. Gao, F. Xu, J. Na, W. Xie, Allelic reprogramming of the histone modification H3K4me3 in early mammalian development. *Nature* **537**, 553–557 (2016).
18. H. Zheng, B. Huang, B. Zhang, Y. Xiang, Z. Du, Q. Xu, Y. Li, Q. Wang, J. Ma, X. Peng, F. Xu, W. Xie, Resetting epigenetic memory by reprogramming of histone modifications in mammals. *Mol. Cell* **63**, 1066–1079 (2016).
19. J. A. Dahl, I. Jung, H. Aanes, G. D. Greggains, A. Manaf, M. Lerdrup, G. Li, S. Kuan, B. Li, A. Y. Lee, S. Preissl, I. Jermstad, M. H. Haugen, R. Suganthan, M. Bjoras, K. Hansen, K. T. Dalen, P. Fedorcsak, B. Ren, A. Klungland, Broad histone H3K4me3 domains in mouse oocytes modulate maternal-to-zygotic transition. *Nature* **537**, 548–552 (2016).
20. X. Liu, C. Wang, W. Liu, J. Li, C. Li, X. Kou, J. Chen, Y. Zhao, H. Gao, H. Wang, Y. Zhang, Y. Gao, S. Gao, Distinct features of H3K4me3 and H3K27me3 chromatin domains in pre-implantation embryos. *Nature* **537**, 558–562 (2016).
21. C. V. Andreu-Vieyra, R. H. Chen, J. E. Agno, S. Glaser, K. Anastassiadis, A. F. Stewart, M. M. Matzuk, MLL2 is required in oocytes for bulk histone 3 lysine 4 trimethylation and transcriptional silencing. *PLOS Biol.* **8**, e1000453 (2010).
22. W. Zhang, Z. Chen, Q. Yin, D. Zhang, C. Racowsky, Y. Zhang, Maternal-biased H3K27me3 correlates with paternal-specific gene expression in the human morula. *Genes Dev.* **33**, 382–387 (2019).
23. M. M. Halstead, X. Ma, C. Zhou, R. M. Schultz, P. J. Ross, Chromatin remodeling in bovine embryos indicates species-specific regulation of genome activation. *Nat. Commun.* **11**, 4654 (2020).
24. H. Okae, H. Chiba, H. Hiura, H. Hamada, A. Sato, T. Utsunomiya, H. Kikuchi, H. Yoshida, A. Tanaka, M. Suyama, T. Arima, Genome-wide analysis of DNA methylation dynamics during early human development. *PLOS Genet.* **10**, e1004868 (2014).
25. S. A. Smallwood, H. J. Lee, C. Angermueller, F. Krueger, H. Saadeh, J. Peet, S. R. Andrews, O. Stegle, W. Reik, G. Kelsey, Single-cell genome-wide bisulfite sequencing for assessing epigenetic heterogeneity. *Nat. Methods* **11**, 817–820 (2014).



26. J. Brind'Amour, H. Kobayashi, J. Richard Albert, K. Shirane, A. Sakashita, A. Kamio, A. Bogutz, T. Koike, M. M. Karimi, L. Lefebvre, T. Kono, M. C. Lorincz, LTR retrotransposons transcribed in oocytes drive species-specific and heritable changes in DNA methylation. *Nat. Commun.* **9**, 3331 (2018).
27. P. J. Skene, J. G. Henikoff, S. Henikoff, Targeted in situ genome-wide profiling with high efficiency for low cell numbers. *Nat. Protoc.* **13**, 1006–1019 (2018).
28. Y. Zhang, Y. Xiang, Q. Yin, Z. Du, X. Peng, Q. Wang, M. Fidalgo, W. Xia, Y. Li, Z. A. Zhao, W. Zhang, J. Ma, F. Xu, J. Wang, L. Li, W. Xie, Dynamic epigenomic landscapes during early lineage specification in mouse embryos. *Nat. Genet.* **50**, 96–105 (2018).
29. Z. Cao, Y. Li, Z. Chen, H. Wang, M. Zhang, N. Zhou, R. Wu, Y. Ling, F. Fang, N. Li, Y. Zhang, Genome-Wide Dynamic Profiling of Histone Methylation during Nuclear Transfer-Mediated Porcine Somatic Cell Reprogramming. *PLOS ONE* **10**, e0144897 (2015).
30. P. J. Ross, N. P. Ragina, R. M. Rodriguez, A. E. Iager, K. Siripattarapivat, N. Lopez-Corrales, J. B. Cibelli, Polycomb gene expression and histone H3 lysine 27 trimethylation changes during bovine preimplantation development. *Reproduction* **136**, 777–785 (2008).
31. T. Q. Dang-Nguyen, T. Somfai, S. Haraguchi, K. Kikuchi, A. Tajima, Y. Kanai, T. Nagai, In vitro production of porcine embryos: Current status, future perspectives and alternative applications. *Anim. Sci. J.* **82**, 374–382 (2011).
32. A. Piliszek, Z. E. Madeja, Pre-implantation Development of Domestic Animals. *Curr. Top. Dev. Biol.* **128**, 267–294 (2018).
33. N. Irie, S. Kuratani, The developmental hourglass model: A predictor of the basic body plan? *Development* **141**, 4649–4655 (2014).
34. G. Sendzikaite, G. Kelsey, The role and mechanisms of DNA methylation in the oocyte. *Essays Biochem.* **63**, 691–705 (2019).
35. W. Xie, C. L. Barr, A. Kim, F. Yue, A. Y. Lee, J. Eubanks, E. L. Dempster, B. Ren, Base-resolution analyses of sequence and parent-of-origin dependent DNA methylation in the mouse genome. *Cell* **148**, 816–831 (2012).
36. M. Kawahara, Q. Wu, N. Takahashi, S. Morita, K. Yamada, M. Ito, A. C. Ferguson-Smith, T. Kono, High-frequency generation of viable mice from engineered bi-maternal embryos. *Nat. Biotechnol.* **25**, 1045–1050 (2007).
37. Z. Li, H. Wan, G. Feng, L. Wang, Z. He, Y. Wang, X. J. Wang, W. Li, Q. Zhou, B. Hu, Birth of fertile bimaternal offspring following intracytoplasmic injection of parthenogenetic haploid embryonic stem cells. *Cell Res.* **26**, 135–138 (2016).
38. C. Zhong, Z. Xie, Q. Yin, R. Dong, S. Yang, Y. Wu, L. Yang, J. Li, Parthenogenetic haploid embryonic stem cells efficiently support mouse generation by oocyte injection. *Cell Res.* **26**, 131–134 (2016).

39. D. N. Weinberg, S. Papillon-Cavanagh, H. Chen, Y. Yue, X. Chen, K. N. Rajagopalan, C. Horth, J. T. McGuire, X. Xu, H. Nikbakht, A. E. Lemiesz, D. M. Marchione, M. R. Marunde, M. J. Meiners, M. A. Cheek, M. C. Keogh, E. Bareke, A. Djedid, A. S. Harutyunyan, N. Jabado, B. A. Garcia, H. Li, C. D. Allis, J. Majewski, C. Lu, The histone mark H3K36me2 recruits DNMT3A and shapes the intergenic DNA methylation landscape. *Nature* **573**, 281–286 (2019).
40. S. Bhattacharya, J. L. Workman, Regulation of SETD2 stability is important for the fidelity of H3K36me3 deposition. *Epigenetics Chromatin* **13**, (2020), 40.
41. W. Yuan, M. Xu, C. Huang, N. Liu, S. Chen, B. Zhu, H3K36 methylation antagonizes PRC2-mediated H3K27 methylation. *J. Biol. Chem.* **286**, 7983–7989 (2011).
42. F. W. Schmitges, A. B. Prusty, M. Faty, A. Stützer, G. M. Lingaraju, J. Aiwazian, R. Sack, D. Hess, L. Li, S. L. Zhou, R. D. Bunker, U. Wirth, T. Bouwmeester, A. Bauer, N. Ly-Hartig, K. H. Zhao, H. M. Chan, J. Gu, H. Gut, W. Fischle, J. Müller, N. H. Thomä, Histone methylation by PRC2 is inhibited by active chromatin marks. *Mol. Cell* **42**, 330–341 (2011).
43. N. P. Blackledge, N. R. Rose, R. J. Klose, Targeting Polycomb systems to regulate gene expression: Modifications to a complex story. *Nat. Rev. Mol. Cell Biol.* **16**, 643–649 (2015).
44. W. Xia, W. Xie, Booting the epigenomes during mammalian early embryogenesis. *Stem Cell Reports* **15**, 1158–1175 (2020).
45. N. Wake, N. Takagi, M. Sasaki, Non-random inactivation of X chromosome in the rat yolk sac. *Nature* **262**, 580–581 (1976).
46. B. Min, J. S. Park, K. Jeon, Y.-K. Kang, Characterization of X-chromosome gene expression in bovine blastocysts derived by in vitro fertilization and somatic cell nuclear transfer. *Front. Genet.* **8**, 42 (2017).
47. D. Yu, X. Du, J. Wang, L. Chen, Y. Wang, H. Xu, Y. Zhao, S. Zhao, Y. Pang, Y. Liu, H. Hao, X. Zhao, W. Du, Y. Dai, N. Li, S. Wu, H. Zhu, No imprinted *XIST* expression in pigs: Biallelic *XIST* expression in early embryos and random X inactivation in placentas. *Cell. Mol. Life Sci.* **76**, 4525–4538 (2019).
48. J. Huang, H. Zhang, X. Wang, K. B. Dobbs, J. Yao, G. Qin, K. Whitworth, E. M. Walters, R. S. Prather, J. Zhao, Impairment of preimplantation porcine embryo development by histone demethylase KDM5B knockdown through disturbance of bivalent H3K4me3-H3K27me3 modifications. *Biol. Reprod.* **92**, 72 (2015).
49. Y. Xiang, Y. Zhang, Q. Xu, C. Zhou, B. Liu, Z. Du, K. Zhang, B. Zhang, X. Wang, S. Gayen, L. Liu, Y. Wang, Y. Li, Q. Wang, S. Kalantry, L. Li, W. Xie, Epigenomic analysis of gastrulation identifies a unique chromatin state for primed pluripotency. *Nat. Genet.* **52**, 95–105 (2020).
50. G. Yang, L. Zhang, W. Liu, Z. Qiao, S. Shen, Q. Zhu, R. Gao, M. Wang, M. Wang, C. Li, M. Liu, J. Sun, L. Wang, W. Liu, X. Cui, K. Zhao, R. Zang, M. Chen, Z. Liang, L. Wang, X. Kou, Y. Zhao, H. Wang, Y. Wang, S. Gao, J. Chen, C. Jiang, Dux-mediated corrections of aberrant H3K9ac during 2-cell genome activation optimize efficiency of somatic cell nuclear transfer. *Cell Stem Cell* **28**, 150–163.e5 (2021).

51. A. Inoue, L. Jiang, F. Lu, T. Suzuki, Y. Zhang, Maternal H3K27me3 controls DNA methylation-independent imprinting. *Nature* **547**, 419–424 (2017).
52. A. Inoue, Z. Chen, Q. Yin, Y. Zhang, Maternal *Eed* knockout causes loss of H3K27me3 imprinting and random X inactivation in the extraembryonic cells. *Genes Dev.* **32**, 1525–1536 (2018).
53. A. M. Deaton, A. Bird, CpG islands and the regulation of transcription. *Genes Dev.* **25**, 1010–1022 (2011).
54. S. K. T. Ooi, C. Qiu, E. Bernstein, K. Li, D. Jia, Z. Yang, H. Erdjument-Bromage, P. Tempst, S.-P. Lin, C. D. Allis, X. Cheng, T. H. Bestor, DNMT3L connects unmethylated lysine 4 of histone H3 to de novo methylation of DNA. *Nature* **448**, 714–717 (2007).
55. A. B. Brinkman, H. Gu, S. J. Bartels, Y. Zhang, F. Matarese, F. Simmer, H. Marks, C. Bock, A. Gnirke, A. Meissner, H. G. Stunnenberg, Sequential ChIP-bisulfite sequencing enables direct genome-scale investigation of chromatin and DNA methylation cross-talk. *Genome Res.* **22**, 1128–1138 (2012).
56. T. Moore, D. Haig, Genomic imprinting in mammalian development: A parental tug-of-war. *Trends Genet.* **7**, 45–49 (1991).
57. Y. W. Cho, T. Hong, S. Hong, H. Guo, H. Yu, D. Kim, T. Guszczynski, G. R. Dressler, T. D. Copeland, M. Kalkum, K. Ge, PTIP associates with MLL3- and MLL4-containing histone H3 lysine 4 methyltransferase complex. *J. Biol. Chem.* **282**, 20395–20406 (2007).
58. S. Picelli, O. R. Faridani, A. K. Bjorklund, G. Winberg, S. Sagasser, R. Sandberg, Full-length RNA-seq from single cells using Smart-seq2. *Nat. Protoc.* **9**, 171–181 (2014).
59. X. Peng, J. Wu, R. Brunmeir, S. Y. Kim, Q. Zhang, C. Ding, W. Han, W. Xie, F. Xu, TELP, a sensitive and versatile library construction method for next-generation sequencing. *Nucleic Acids Res.* **43**, e35 (2015).
60. B. Langmead, S. L. Salzberg, Fast gapped-read alignment with Bowtie 2. *Nat. Methods* **9**, 357–359 (2012).
61. C. Trapnell, L. Pachter, S. L. Salzberg, TopHat: Discovering splice junctions with RNA-Seq. *Bioinformatics* **25**, 1105–1111 (2009).
62. C. Trapnell, A. Roberts, L. Goff, G. Pertea, D. Kim, D. R. Kelley, H. Pimentel, S. L. Salzberg, J. L. Rinn, L. Pachter, Differential gene and transcript expression analysis of RNA-seq experiments with TopHat and Cufflinks. *Nat. Protoc.* **7**, 562–578 (2012).
63. M. Martin, Cutadapt removes adapter sequences from high-throughput sequencing reads. *EMBnet J.* **17**, 10 (2011).
64. F. Krueger, S. R. Andrews, Bismark: A flexible aligner and methylation caller for Bisulfite-Seq applications. *Bioinformatics* **27**, 1571–1572 (2011).

65. E. Becht, L. McInnes, J. Healy, C. A. Dutertre, I. W. H. Kwok, L. G. Ng, F. Ginhoux, E. W. Newell, Dimensionality reduction for visualizing single-cell data using UMAP. *Nat. Biotechnol.* **37**, 38–44 (2019).
66. S. Durinck, Y. Moreau, A. Kasprzyk, S. Davis, B. De Moor, A. Brazma, W. Huber, BioMart and Bioconductor: A powerful link between biological databases and microarray data analysis. *Bioinformatics* **21**, 3439–3440 (2005).
67. B. J. Lesch, S. J. Silber, J. R. McCarrey, D. C. Page, Parallel evolution of male germline epigenetic poisoning and somatic development in animals. *Nat. Genet.* **48**, 888–894 (2016).
68. R. Lister, M. Pelizzola, R. H. Dowen, R. D. Hawkins, G. Hon, J. Tonti-Filippini, J. R. Nery, L. Lee, Z. Ye, Q. M. Ngo, L. Edsall, J. Antosiewicz-Bourget, R. Stewart, V. Ruotti, A. H. Millar, J. A. Thomson, B. Ren, J. R. Ecker, Human DNA methylomes at base resolution show widespread epigenomic differences. *Nature* **462**, 315–322 (2009).
69. Y. S. Bogliotti, J. Wu, M. Vilarino, D. Okamura, D. A. Soto, C. Zhong, M. Sakurai, R. V. Sampaio, K. Suzuki, J. C. Izpisua Belmonte, P. J. Ross, Efficient derivation of stable primed pluripotent embryonic stem cells from bovine blastocysts. *Proc. Natl. Acad. Sci. U.S.A.* **115**, 2090–2095 (2018).
70. S. Xiao, D. Xie, X. Cao, P. Yu, X. Xing, C. C. Chen, M. Musselman, M. Xie, F. D. West, H. A. Lewin, T. Wang, S. Zhong, Comparative epigenomic annotation of regulatory DNA. *Cell* **149**, 1381–1392 (2012).
71. G. Dennis Jr., B. T. Sherman, D. A. Hosack, J. Yang, W. Gao, H. C. Lane, R. A. Lempicki, DAVID: Database for Annotation, Visualization, and Integrated Discovery. *Genome Biol.* **4**, P3 (2003).
72. J. Wu, B. Huang, H. Chen, Q. Yin, Y. Liu, Y. Xiang, B. Zhang, B. Liu, Q. Wang, W. Xia, W. Li, Y. Li, J. Ma, X. Peng, H. Zheng, J. Ming, W. Zhang, J. Zhang, G. Tian, F. Xu, Z. Chang, J. Na, X. Yang, W. Xie, The landscape of accessible chromatin in mammalian preimplantation embryos. *Nature* **534**, 652–657 (2016).
3. ENCODE Project Consortium, An integrated encyclopedia of DNA elements in the human genome. *Nature* **489**, 57–74 (2012).
74. Y. Zhou, S. L. Liu, Y. Hu, L. Z. Fang, Y. H. Gao, H. Xia, S. G. Schroeder, B. D. Rosen, E. E. Connor, C. J. Li, R. L. Baldwin, J. B. Cole, C. P. Van Tassell, L. G. Yang, L. Ma, G. E. Liu, Comparative whole genome DNA methylation profiling across cattle tissues reveals global and tissue-specific methylation patterns. *BMC Biol.* **18**, 85 (2020).
75. M. D. Johnson, M. Mueller, M. Adamowicz-Brice, M. J. Collins, P. Gellert, K. Maratou, P. K. Srivastava, M. Rotival, S. Butt, L. Game, S. S. Atanur, N. Silver, P. J. Norsworthy, S. R. Langley, E. Petretto, M. Pravenec, T. J. Aitman, Genetic analysis of the cardiac methylome at single nucleotide resolution in a model of human cardiovascular disease. *PLoS Genet.* **10**, e1004813 (2014).
76. G. C. Hon, N. Rajagopal, Y. Shen, D. F. McCleary, F. Yue, M. D. Dang, B. Ren, Epigenetic memory at embryonic enhancers identified in DNA methylation maps from adult mouse tissues. *Nat. Genet.* **45**, 1198–1206 (2013).

77. Y. Shen, F. Yue, D. F. McCleary, Z. Ye, L. Edsall, S. Kuan, U. Wagner, J. Dixon, L. Lee, V. V. Lobanenkov, B. Ren, A map of the cis-regulatory sequences in the mouse genome. *Nature* **488**, 116–120 (2012).
78. Y. Yang, X. Fan, J. Yan, M. Chen, M. Zhu, Y. Tang, S. Liu, Z. Tang, A comprehensive epigenome atlas reveals DNA methylation regulating skeletal muscle development. *Nucleic Acids Res.* **49**, 1313–1329 (2021).
79. J. E. Duan, Z. C. Jiang, F. Alqahtani, I. Mandoiu, H. Dong, X. Zheng, S. L. Marjani, J. Chen, X. C. Tian, Methylome dynamics of bovine gametes and in vivo early embryos. *Front. Genet.* **10**, 512 (2019).
80. Z. Du, H. Zheng, Y. K. Kawamura, K. Zhang, J. Gassler, S. Powell, Q. Xu, Z. Lin, K. Xu, Q. Zhou, E. A. Ozonov, N. Véron, B. Huang, L. Li, G. Yu, L. Liu, W. K. A. Yeung, P. Wang, L. Chang, Q. Wang, A. He, Y. Sun, J. Na, Q. Sun, H. Sasaki, K. Tachibana, A. H. F. M. Peters, W. Xie, Polycomb group proteins regulate chromatin architecture in mouse oocytes and early embryos. *Mol. Cell* **77**, 825–839.e7 (2020).
81. L. Wang, J. Zhang, J. Duan, X. Gao, W. Zhu, X. Lu, L. Yang, J. Zhang, G. Li, W. Ci, W. Li, Q. Zhou, N. Aluru, F. Tang, C. He, X. Huang, J. Liu, Programming and inheritance of parental DNA methylomes in mammals. *Cell* **157**, 979–991 (2014).
